# Supplementary material for: A Panchromatic Cyclometalated Iridium Dye Based on 2-Thienyl-Perimidine
Source: MDPI journal article supplement (doi:10.3390/molecules27103201), 2022-05-17

## checkCIF/PLATON report

Structure factors have been supplied for datablock(s) bz15neo\_1

THIS REPORT IS FOR GUIDANCE ONLY. IF USED AS PART OF A REVIEW PROCEDURE FOR PUBLICATION, IT SHOULD NOT REPLACE THE EXPERTISE OF AN EXPERIENCED CRYSTALLOGRAPHIC REFEREE.

No syntax errors found.      CIF dictionary      Interpreting this report

### Datablock: bz15neo\_1

---

Bond precision:    C-C = 0.0032 Å

Wavelength=0.71073

Cell:                    a=11.3183(5)                    b=13.0884(7)                    c=20.3399(9)  
                          alpha=106.294(2)                    beta=103.709(1)                    gamma=90.068(2)  
Temperature:    100 K

|                        | Calculated                                        | Reported                                          |
|------------------------|---------------------------------------------------|---------------------------------------------------|
| Volume                 | 2802.3(2)                                         | 2802.3(2)                                         |
| Space group            | P -1                                              | P -1                                              |
| Hall group             | -P 1                                              | -P 1                                              |
| Moiety formula         | C44 H30 Ir N6 O4 S2, F6 P, 3(C H2 Cl2), 3(C H4 O) | C44 H30 Ir N6 O4 S2, F6 P, 3(C H2 Cl2), 3(C H4 O) |
| Sum formula            | C50 H48 Cl6 F6 Ir N6 O7 P S2                      | C50 H48 Cl6 F6 Ir N6 O7 P S2                      |
| Mr                     | 1458.95                                           | 1458.93                                           |
| Dx, g cm <sup>-3</sup> | 1.729                                             | 1.729                                             |
| Z                      | 2                                                 | 2                                                 |
| Mu (mm <sup>-1</sup> ) | 2.848                                             | 2.848                                             |
| F000                   | 1452.0                                            | 1452.0                                            |
| F000'                  | 1452.22                                           |                                                   |
| h, k, lmax             | 17, 20, 31                                        | 17, 20, 31                                        |
| Nref                   | 22421                                             | 21801                                             |
| Tmin, Tmax             | 0.565, 0.652                                      | 0.603, 0.747                                      |
| Tmin'                  | 0.500                                             |                                                   |

Correction method= # Reported T Limits: Tmin=0.603 Tmax=0.747

AbsCorr = MULTII-SCAN

Data completeness= 0.972

Theta(max)= 33.747

R(reflections)= 0.0300( 19979)

wR2(reflections)=  
0.0758( 21801)

S = 1.041

Npar= 725

---

The following ALERTS were generated. Each ALERT has the format

**test-name\_ALERT\_alert-type\_alert-level.**

Click on the hyperlinks for more details of the test.

---

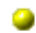

### Alert level C

|                   |         |                                            |       |        |
|-------------------|---------|--------------------------------------------|-------|--------|
| PLAT243_ALERT_4_C | High    | 'Solvent' Ueq as Compared to Neighbors of  | C027  | Check  |
| PLAT244_ALERT_4_C | Low     | 'Solvent' Ueq as Compared to Neighbors of  | P004  | Check  |
| PLAT250_ALERT_2_C | Large   | U3/U1 Ratio for Average U(i,j) Tensor .... | 2.2   | Note   |
| PLAT417_ALERT_2_C | Short   | Inter D-H..H-D H00K ..H00L .               | 2.14  | Ang.   |
|                   |         | x,y,z =                                    | 1_555 | Check  |
| PLAT911_ALERT_3_C | Missing | FCF Refl Between Thmin & STh/L= 0.600      | 3     | Report |
| PLAT971_ALERT_2_C | Check   | Calcd Resid. Dens. 0.68Ang From Ir01       | 2.23  | eA-3   |
| PLAT972_ALERT_2_C | Check   | Calcd Resid. Dens. 0.59Ang From Cl2        | -1.85 | eA-3   |
| PLAT972_ALERT_2_C | Check   | Calcd Resid. Dens. 0.45Ang From Cl2        | -1.66 | eA-3   |
| PLAT972_ALERT_2_C | Check   | Calcd Resid. Dens. 0.39Ang From Cl2        | -1.53 | eA-3   |
| PLAT972_ALERT_2_C | Check   | Calcd Resid. Dens. 0.50Ang From ClB        | -1.53 | eA-3   |

---

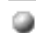

### Alert level G

|                   |                                                  |       |        |
|-------------------|--------------------------------------------------|-------|--------|
| PLAT007_ALERT_5_G | Number of Unrefined Donor-H Atoms .....          | 5     | Report |
| PLAT171_ALERT_4_G | The CIF-Embedded .res File Contains EADP Records | 1     | Report |
| PLAT300_ALERT_4_G | Atom Site Occupancy of ClB Constrained at        | 0.5   | Check  |
| PLAT300_ALERT_4_G | Atom Site Occupancy of ClA Constrained at        | 0.5   | Check  |
| PLAT300_ALERT_4_G | Atom Site Occupancy of H02A Constrained at       | 0.5   | Check  |
| PLAT300_ALERT_4_G | Atom Site Occupancy of H02B Constrained at       | 0.5   | Check  |
| PLAT300_ALERT_4_G | Atom Site Occupancy of H02C Constrained at       | 0.5   | Check  |
| PLAT300_ALERT_4_G | Atom Site Occupancy of H02D Constrained at       | 0.5   | Check  |
| PLAT302_ALERT_4_G | Anion/Solvent/Minor-Residue Disorder (Resd 3 )   | 33%   | Note   |
| PLAT432_ALERT_2_G | Short Inter X...Y Contact O00K ..C01L .          | 2.92  | Ang.   |
|                   | -x,1-y,1-z =                                     | 2_566 | Check  |
| PLAT720_ALERT_4_G | Number of Unusual/Non-Standard Labels .....      | 125   | Note   |
| PLAT910_ALERT_3_G | Missing # of FCF Reflection(s) Below Theta(Min). | 4     | Note   |
| PLAT912_ALERT_4_G | Missing # of FCF Reflections Above STh/L= 0.600  | 613   | Note   |
| PLAT933_ALERT_2_G | Number of HKL-OMIT Records in Embedded .res File | 4     | Note   |
| PLAT978_ALERT_2_G | Number C-C Bonds with Positive Residual Density. | 3     | Info   |

---

- 0 **ALERT level A** = Most likely a serious problem - resolve or explain  
0 **ALERT level B** = A potentially serious problem, consider carefully  
10 **ALERT level C** = Check. Ensure it is not caused by an omission or oversight  
15 **ALERT level G** = General information/check it is not something unexpected

- 0 ALERT type 1 CIF construction/syntax error, inconsistent or missing data  
10 ALERT type 2 Indicator that the structure model may be wrong or deficient  
2 ALERT type 3 Indicator that the structure quality may be low  
12 ALERT type 4 Improvement, methodology, query or suggestion  
1 ALERT type 5 Informative message, check
- 
-

It is advisable to attempt to resolve as many as possible of the alerts in all categories. Often the minor alerts point to easily fixed oversights, errors and omissions in your CIF or refinement strategy, so attention to these fine details can be worthwhile. In order to resolve some of the more serious problems it may be necessary to carry out additional measurements or structure refinements. However, the purpose of your study may justify the reported deviations and the more serious of these should normally be commented upon in the discussion or experimental section of a paper or in the "special\_details" fields of the CIF. checkCIF was carefully designed to identify outliers and unusual parameters, but every test has its limitations and alerts that are not important in a particular case may appear. Conversely, the absence of alerts does not guarantee there are no aspects of the results needing attention. It is up to the individual to critically assess their own results and, if necessary, seek expert advice.

### **Publication of your CIF in IUCr journals**

A basic structural check has been run on your CIF. These basic checks will be run on all CIFs submitted for publication in IUCr journals (*Acta Crystallographica*, *Journal of Applied Crystallography*, *Journal of Synchrotron Radiation*); however, if you intend to submit to *Acta Crystallographica Section C* or *E* or *IUCrData*, you should make sure that full publication checks are run on the final version of your CIF prior to submission.

### **Publication of your CIF in other journals**

Please refer to the *Notes for Authors* of the relevant journal for any special instructions relating to CIF submission.

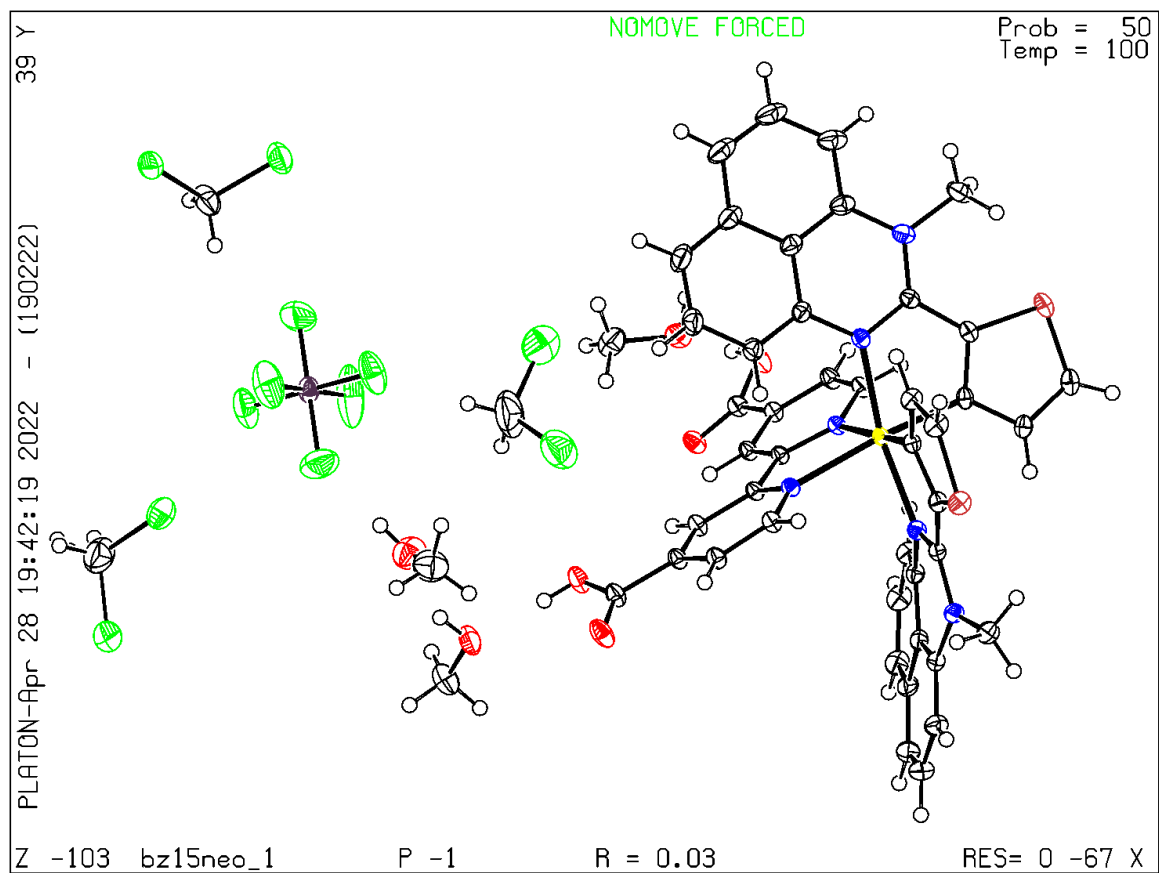

Supplement: s1 [file s1]
