# Supplementary material for: A Panchromatic Cyclometalated Iridium Dye Based on 2-Thienyl-Perimidine
Source: MDPI journal article supplement (doi:10.3390/molecules27103201), 2022-05-17
Supplement: s1 [file s1]

## Supplementary material

### **A panchromatic cyclometalated iridium dye based on 2-thienyl-perimidine**

Paulina Kalle, Marina A. Kiseleva, Sergei V. Tatarin, Daniil E. Smirnov, Alexander Y. Zakharov, Viktor V. Emets, Andrei V. Churakov, and Stanislav I. Bezzubov

Part 1. NMR spectroscopy and high-resolution mass-spectrometry data: Figures S1–S12;

Part 2. X-ray crystallography: Tables S1–S4, Figures S13–S20;

Part 3. Electrochemical and photovoltaic data: Figures S21–S27;

Part 4. Computational results: Table S5, Figures S28–S30.

# 1. NMR and high-resolution mass-spectra

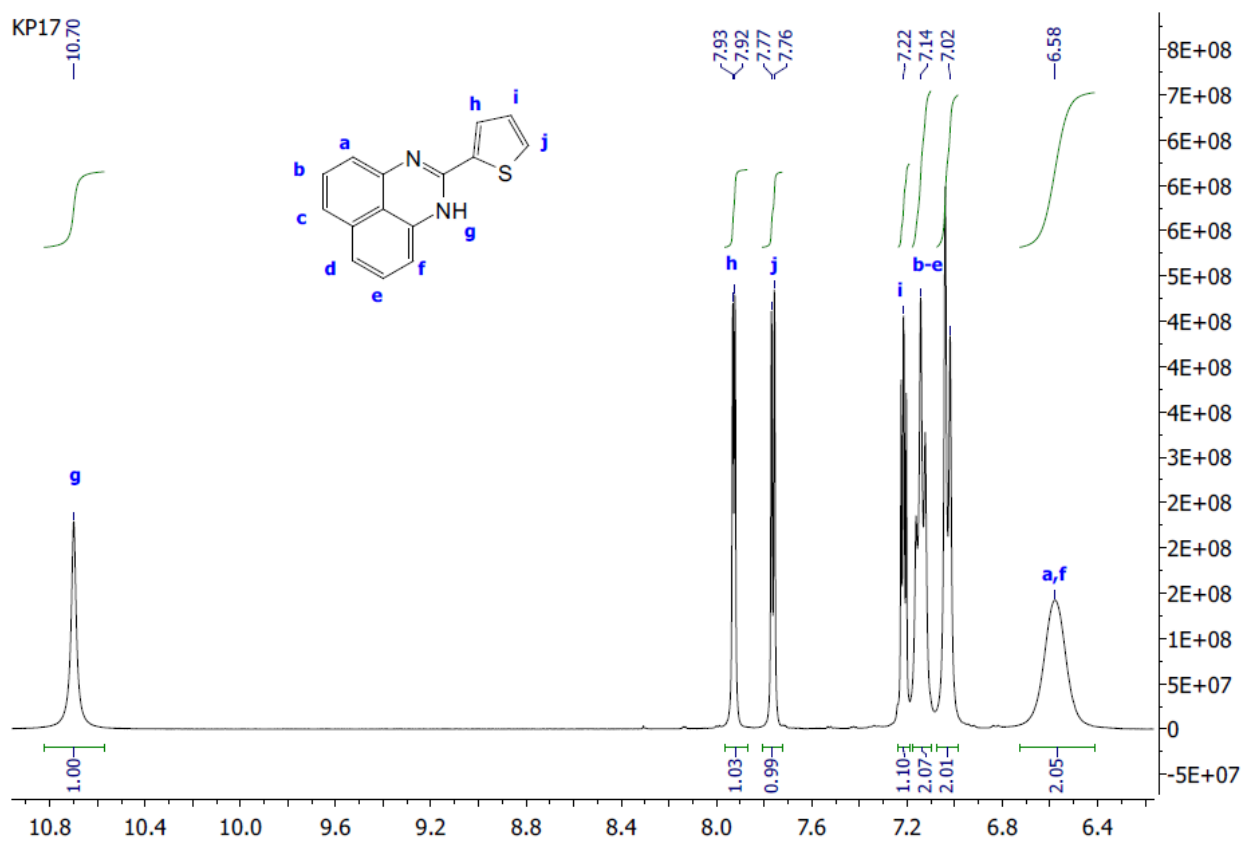

**Figure S1.** The aromatic part of  $^1\text{H}$  NMR spectrum of **L1** ( $\text{CDCl}_3$ , 400 MHz,  $25^\circ\text{C}$ ).

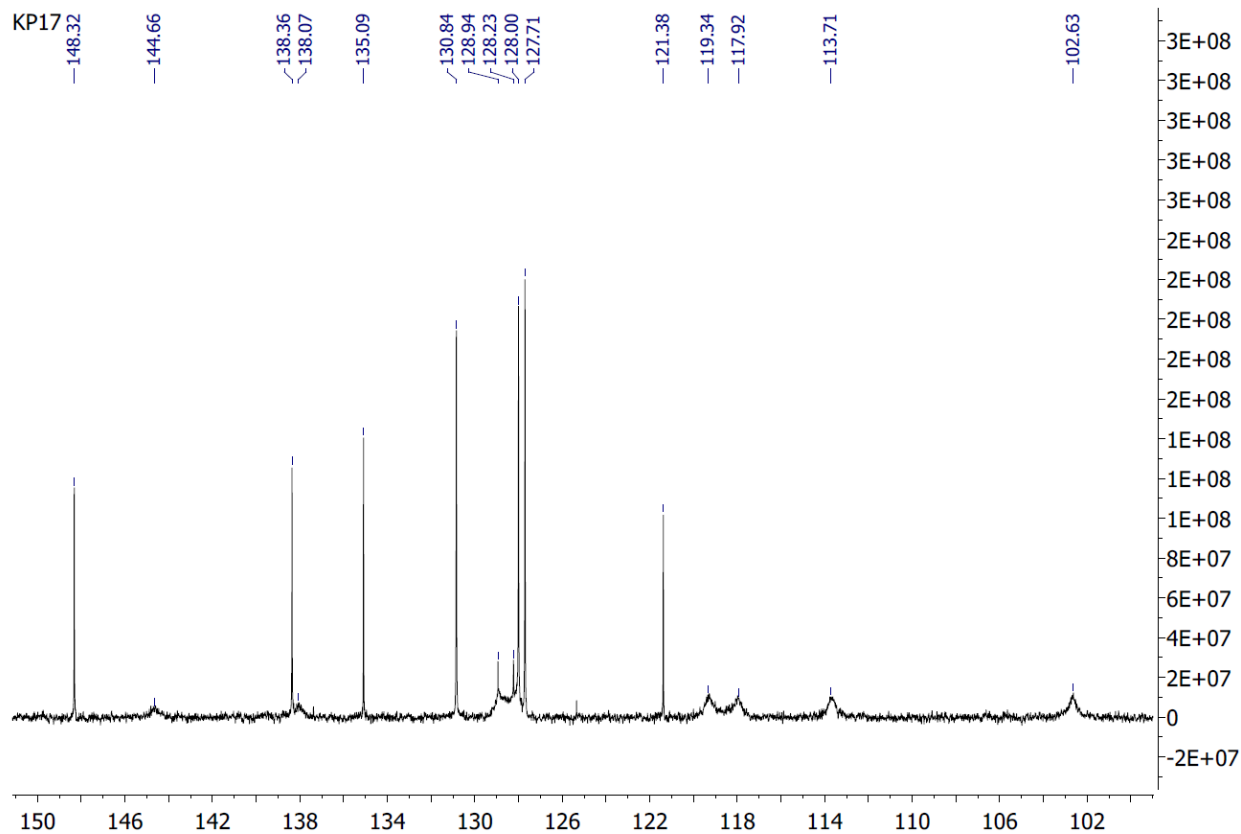

**Figure S2.**  $^{13}\text{C}\{^1\text{H}\}$  NMR spectrum of **L1** ( $\text{CDCl}_3$ , 101 MHz,  $25^\circ\text{C}$ ).

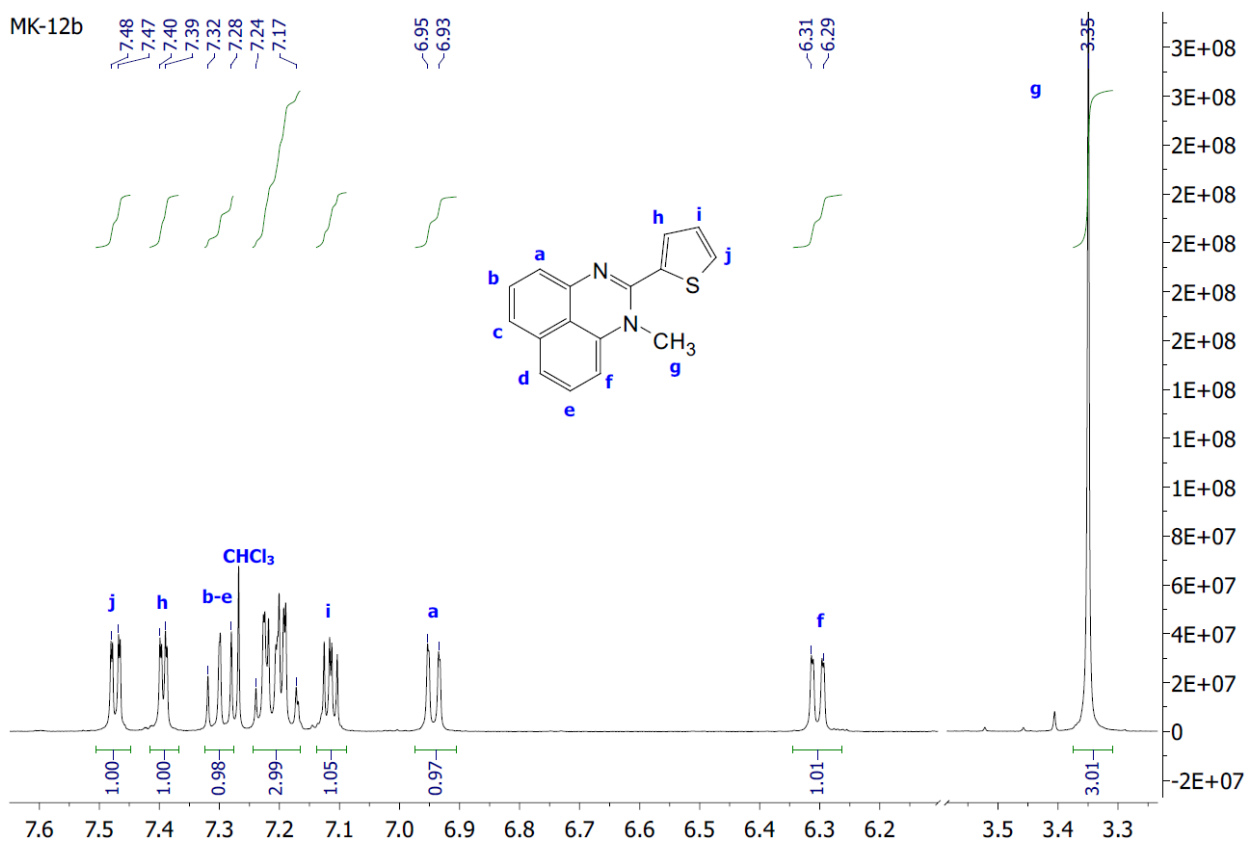

**Figure S3.** <sup>1</sup>H NMR spectrum of **L2** (CDCl<sub>3</sub>, 400 MHz, 25°C).

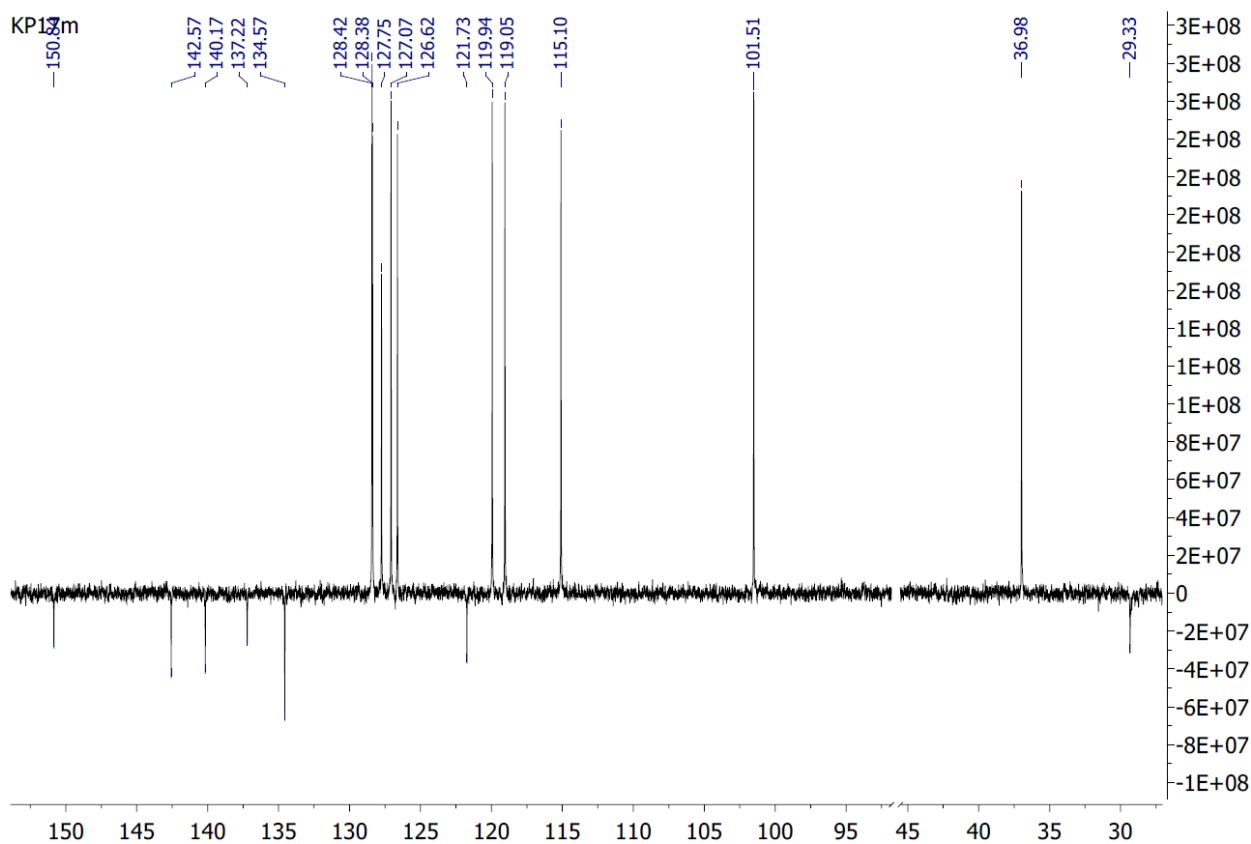

**Figure S4.** <sup>13</sup>C{<sup>1</sup>H} NMR spectrum of **L2** (CDCl<sub>3</sub>, 101 MHz, 25°C).

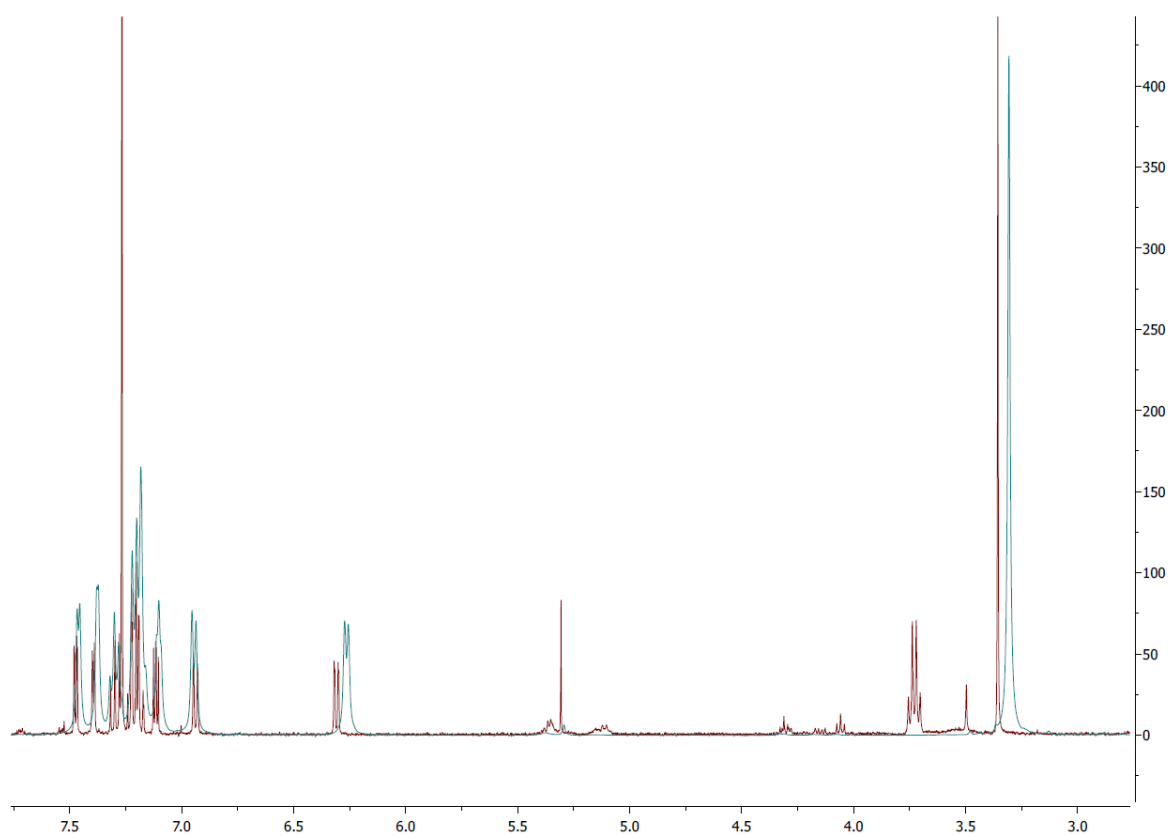

**Figure S5.**  $^1\text{H}$  NMR spectrum of the reaction mixture (*red*) and the ligand **L2** (*blue*) ( $\text{CDCl}_3$ , 400 MHz,  $25^\circ\text{C}$ ).

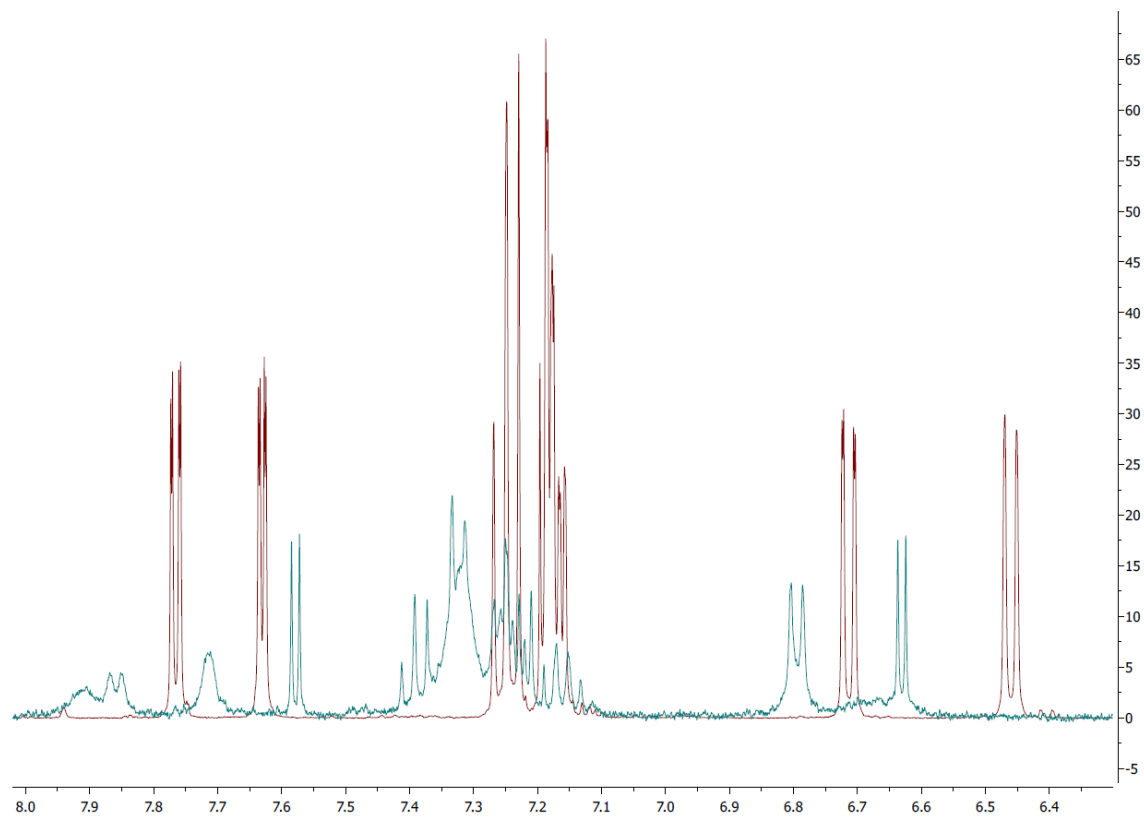

**Figure S6.** The aromatic part of  $^1\text{H}$  NMR spectrum of **1** (*blue*) and **L2** (*red*) ( $\text{DMSO}-d_6$ , 400 MHz,  $25^\circ\text{C}$ ).

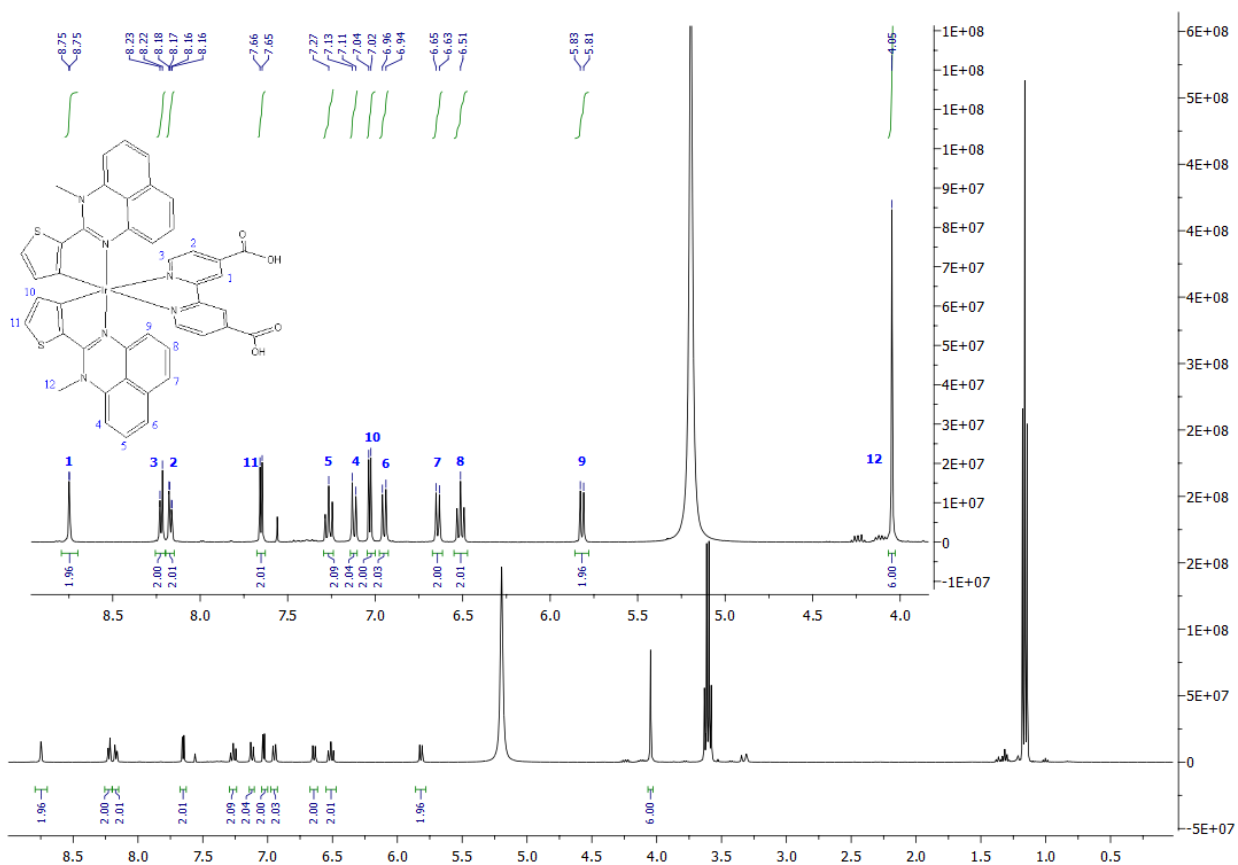

**Figure S7.**  $^1\text{H}$  NMR spectrum of **2** ( $\text{CD}_3\text{OD}$ , 400 MHz, 25°C).

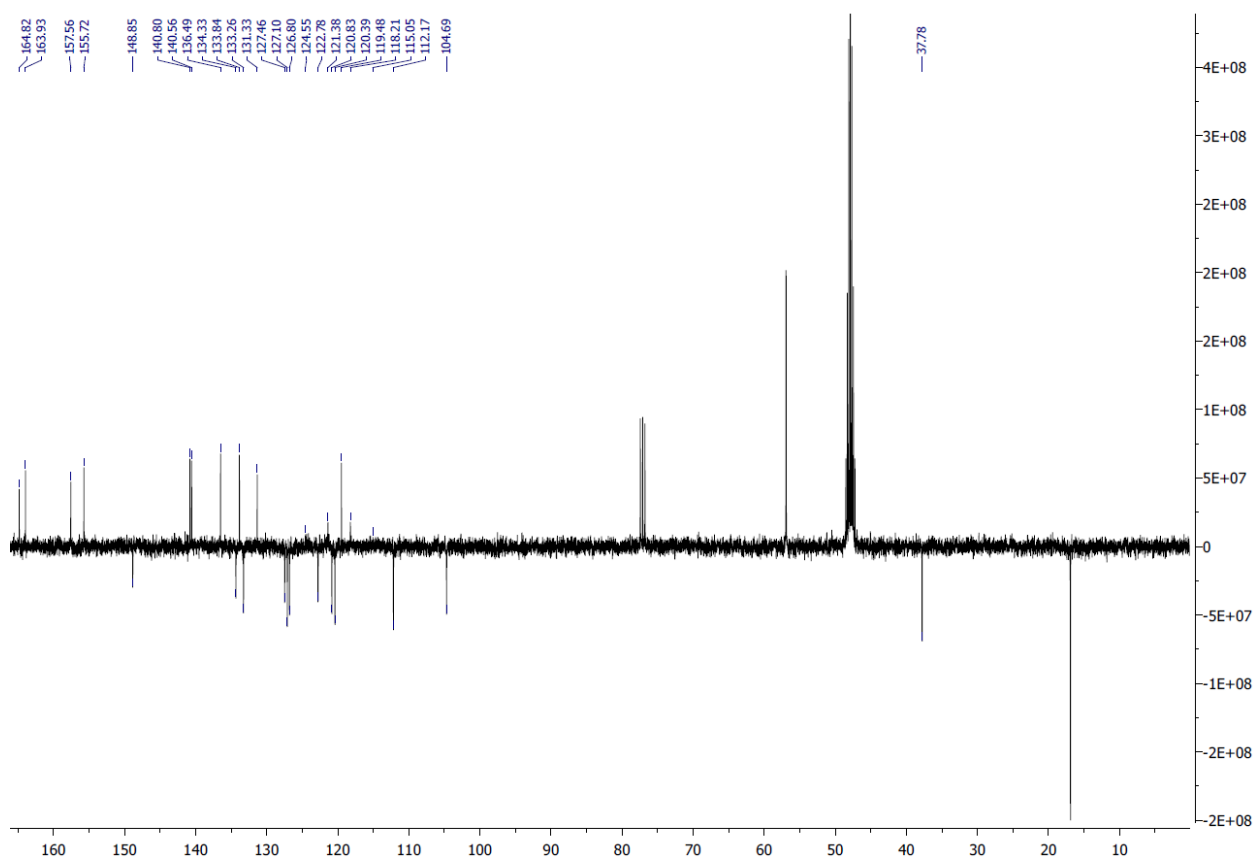

**Figure S8.**  $^{13}\text{C}\{^1\text{H}\}$  NMR spectrum of **2** ( $\text{CD}_3\text{OD}$ , 101 MHz, 25°C).

■ +TOF MS: 1.3717 to 1.6553 min from Sample 51 (BZ14) of 28\_05\_21.wiff different calibrations (DuoSpray (j))

Max. 1.2e4 cps.

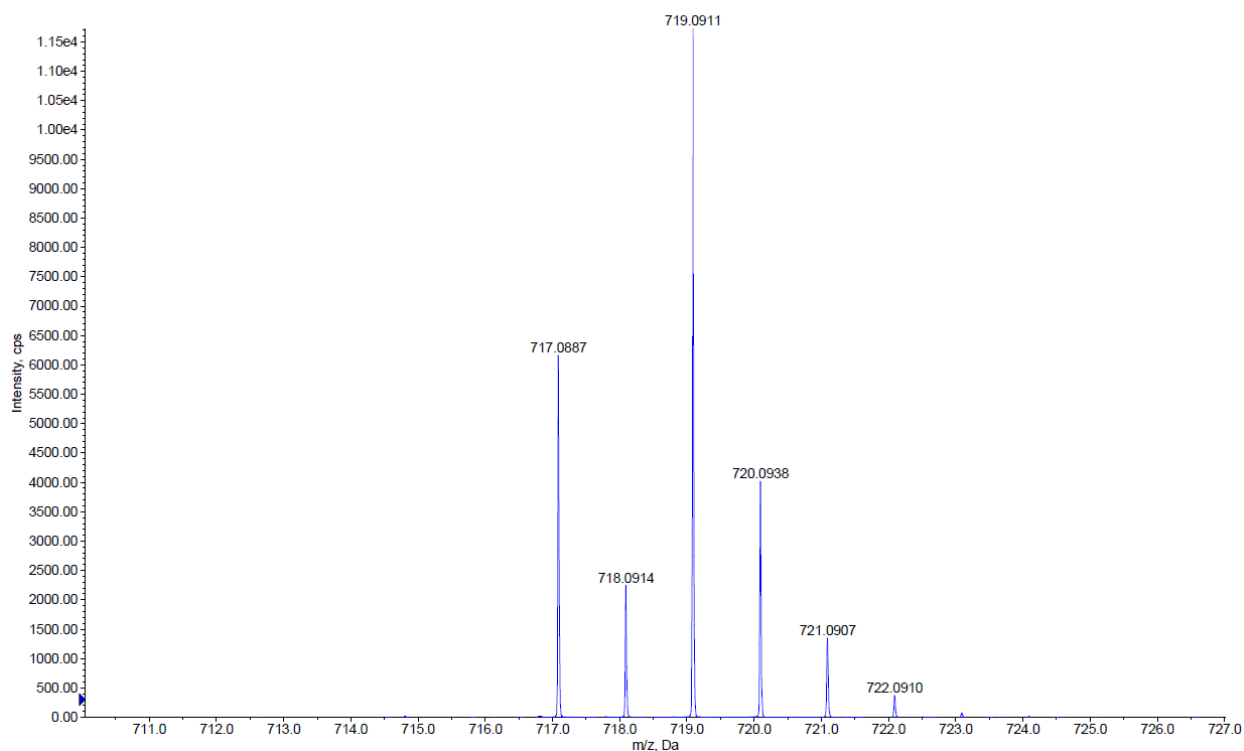

**Figure S9.** Fragment of high-resolution mass-spectrum of **1**.

■ +TOF MS: 1.3717 to 1.6553 min from Sample 51 (BZ14) of 28\_05\_21.wiff different calibrations (DuoSpray (j))

Max. 1.2e4 cps.

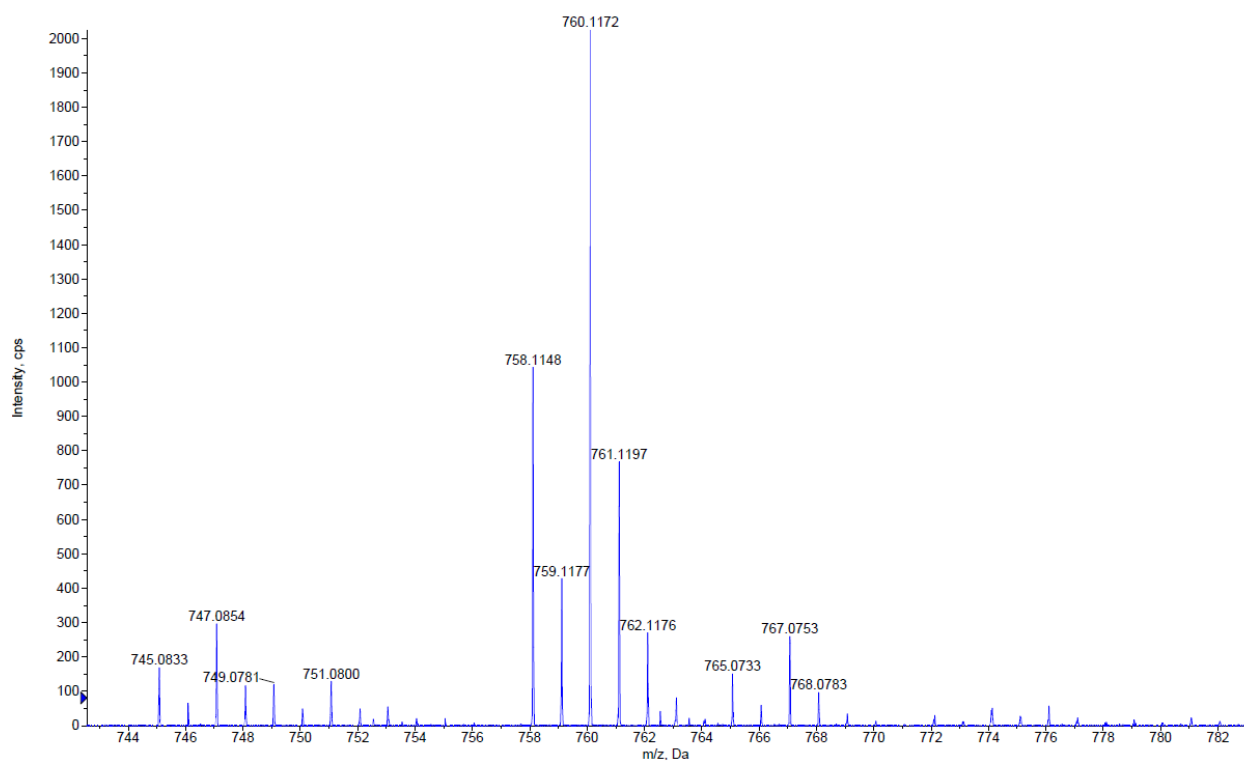

**Figure S10.** Fragment of high-resolution mass-spectrum of **1**.

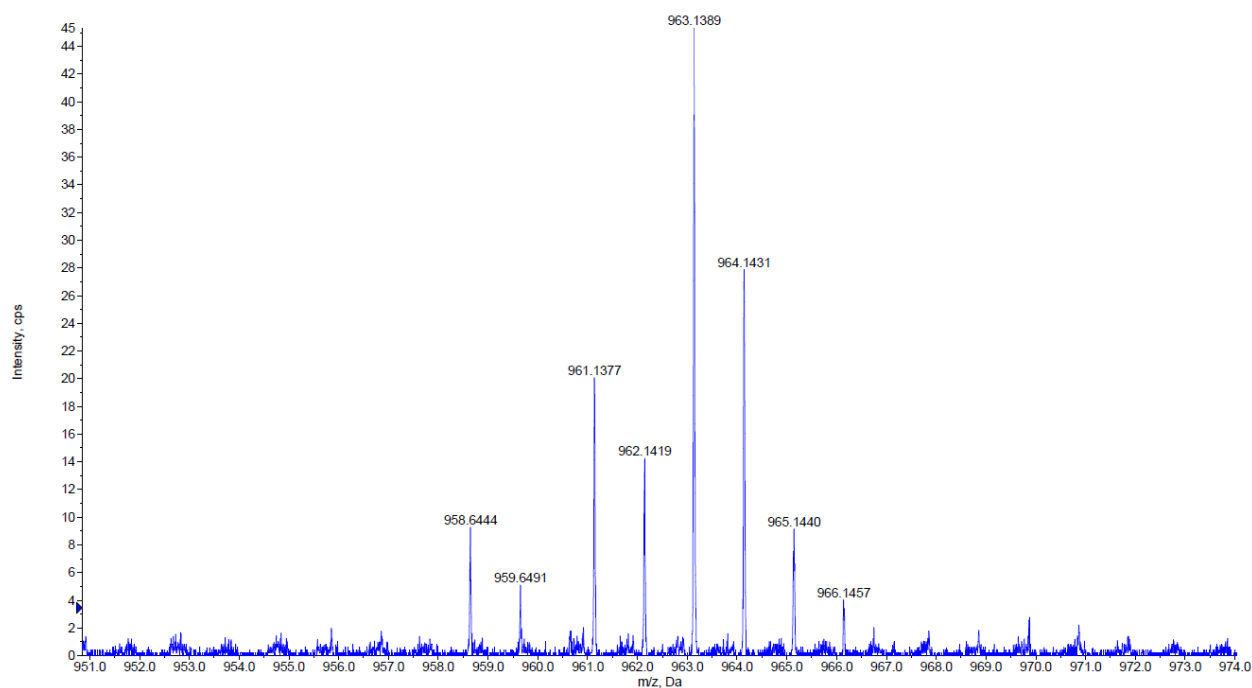

**Figure S11.** Fragment of high-resolution mass-spectrum of **2**.

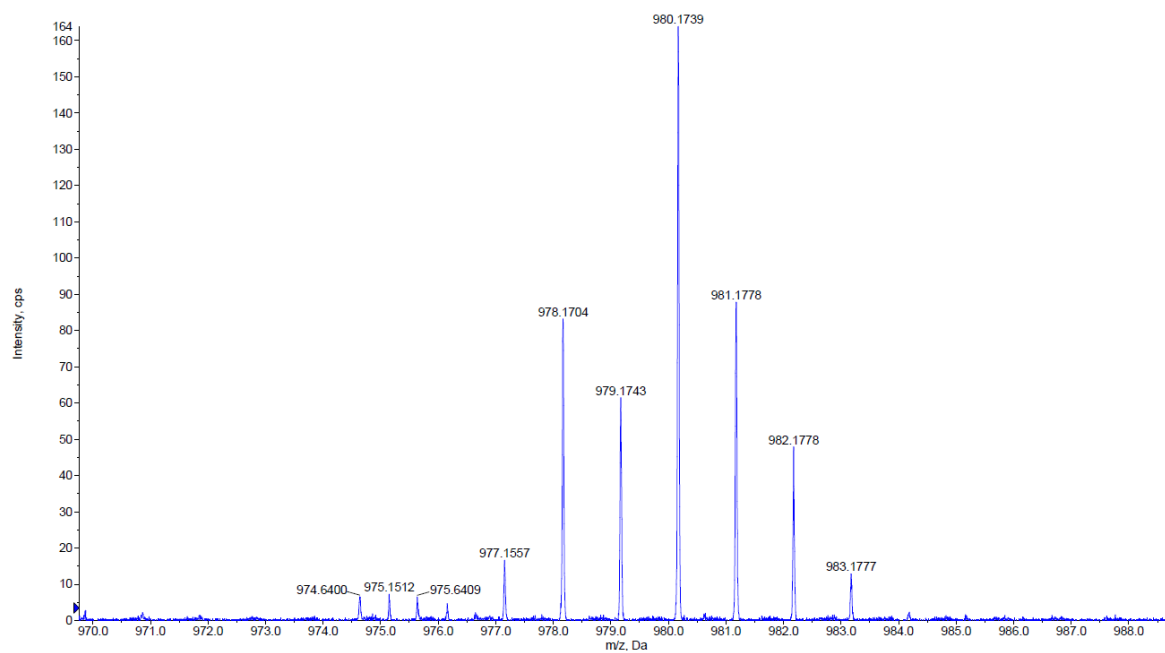

**Figure S12.** Fragment of high-resolution mass-spectrum of **2**.

## 2. X-ray crystallography

Table S1. Details of the X-ray crystal data collection and structure refinement for **L1**, **L2**, **1** and **2**.

| Compound                                   | <b>L1</b>                                                                        | <b>L2</b>                                        | <b>1</b>                                                                                      | <b>2</b>                                                                                                                                                                         |
|--------------------------------------------|----------------------------------------------------------------------------------|--------------------------------------------------|-----------------------------------------------------------------------------------------------|----------------------------------------------------------------------------------------------------------------------------------------------------------------------------------|
| Formula                                    | C <sub>15</sub> H <sub>10</sub> N <sub>2</sub> S·CH <sub>2</sub> Cl <sub>2</sub> | C <sub>16</sub> H <sub>12</sub> N <sub>2</sub> S | C <sub>64</sub> H <sub>44</sub> N <sub>8</sub> Cl <sub>2</sub> S <sub>4</sub> Ir <sub>2</sub> | C <sub>44</sub> H <sub>30</sub> N <sub>6</sub> O <sub>4</sub> S <sub>2</sub> Ir <sup>+</sup> ·PF <sub>6</sub> <sup>-</sup> ·3CH <sub>3</sub> OH·3CH <sub>2</sub> Cl <sub>2</sub> |
| M <sub>w</sub>                             | 335.24                                                                           | 3824.08                                          | 1508.61                                                                                       | 1458.93                                                                                                                                                                          |
| Temperature (K)                            | 100(2)                                                                           | 100(2)                                           | 100(2)                                                                                        | 100(2)                                                                                                                                                                           |
| Size (mm)                                  | 0.10 x 0.12 x 0.20                                                               | 0.16 x 0.20 x 0.25                               | 0.01 x 0.08 x 0.12                                                                            | 0.15 x 0.17 x 0.24                                                                                                                                                               |
| Cryst. system                              | monoclinic                                                                       | triclinic                                        | monoclinic                                                                                    | triclinic                                                                                                                                                                        |
| Space group                                | P2 <sub>1</sub> /c                                                               | P-1                                              | P2 <sub>1</sub> /c                                                                            | P-1                                                                                                                                                                              |
| <i>a</i> (Å)                               | 10.9054(5)                                                                       | 7.7813(4)                                        | 31.2214(18)                                                                                   | 11.3183(5)                                                                                                                                                                       |
| <i>b</i> (Å)                               | 14.4126(6)                                                                       | 11.5947(5)                                       | 12.4801(7)                                                                                    | 13.0884(7)                                                                                                                                                                       |
| <i>c</i> (Å)                               | 9.6793(4)                                                                        | 13.6577(6)                                       | 16.8310(9)                                                                                    | 20.3399(9)                                                                                                                                                                       |
| <i>α</i> (°)                               | 90                                                                               | 90                                               | 90                                                                                            | 106.294(2)                                                                                                                                                                       |
| <i>β</i> (°)                               | 103.512(2)                                                                       | 93.067(2)                                        | 103.036(2)                                                                                    | 103.709(1)                                                                                                                                                                       |
| <i>γ</i> (°)                               | 90                                                                               | 90                                               | 90                                                                                            | 90.068(2)                                                                                                                                                                        |
| <i>V</i> (Å <sup>3</sup> )                 | 1479.24(11)                                                                      | 1230.46(10)                                      | 6389.1(6)                                                                                     | 2802.3(2)                                                                                                                                                                        |
| <i>Z</i>                                   | 4                                                                                | 4                                                | 4                                                                                             | 2                                                                                                                                                                                |
| <i>θ</i> range (deg)                       | 2.39 < <i>θ</i> < 30.00                                                          | 2.31 < <i>θ</i> < 29.50                          | 1.77 < <i>θ</i> < 30.9                                                                        | 1.90 < <i>θ</i> < 33.75                                                                                                                                                          |
| collected/unique rflns                     | 18307 / 4305                                                                     | 14031 / 3416                                     | 80319 / 20156                                                                                 | 138712 / 21801                                                                                                                                                                   |
| Completeness to <i>θ</i> (%)               | 99.7                                                                             | 99.7                                             | 99.8                                                                                          | 97.2                                                                                                                                                                             |
| data/restraints/params                     | 4305 / 0 / 238                                                                   | 3416 / 1 / 191                                   | 20156 / 0 / 725                                                                               | 21801 / 0 / 725                                                                                                                                                                  |
| Goodness of fit on <i>F</i> <sup>2</sup>   | 1.061                                                                            | 1.036                                            | 1.064                                                                                         | 1.041                                                                                                                                                                            |
| Final <i>R</i> indices                     | R1 = 0.0345                                                                      | R1 = 0.0394                                      | R1 = 0.0501                                                                                   | R1 = 0.0300                                                                                                                                                                      |
| ( <i>I</i> > 2σ( <i>I</i> ))               | wR2 = 0.0832                                                                     | wR2 = 0.0957                                     | wR2 = 0.1065                                                                                  | wR2 = 0.0737                                                                                                                                                                     |
| Largest diff peak/hole (e/Å <sup>3</sup> ) | 0.47 / -0.29                                                                     | 0.30 / -0.20                                     | 5.69 / -4.68                                                                                  | 2.30 / -1.88                                                                                                                                                                     |

Table S2. Selected bond lengths (Å) and angles (°) in structures of complexes **1** and **2** and in calculated structure of complex **1**.

|                         |                                                   |                                                 |                                                 |                                                 |                                                  |                                                  |
|-------------------------|---------------------------------------------------|-------------------------------------------------|-------------------------------------------------|-------------------------------------------------|--------------------------------------------------|--------------------------------------------------|
| <b>1<sub>exp</sub></b>  | Ir <sub>1</sub> –C <sub>1</sub>                   | Ir <sub>1</sub> –C <sub>2</sub>                 | Ir <sub>1</sub> –N <sub>1</sub>                 | Ir <sub>1</sub> –N <sub>2</sub>                 | Ir <sub>1</sub> –Cl <sub>1</sub>                 | Ir <sub>1</sub> –Cl <sub>2</sub>                 |
|                         | 1.961(6)                                          | 1.964(6)                                        | 2.088(5)                                        | 2.098(5)                                        | 2.5109(14)                                       | 2.5199(14)                                       |
|                         | Cl <sub>1</sub> –Ir <sub>1</sub> –Cl <sub>2</sub> | C <sub>1</sub> –Ir <sub>1</sub> –C <sub>2</sub> | C <sub>1</sub> –Ir <sub>1</sub> –N <sub>2</sub> | C <sub>2</sub> –Ir <sub>1</sub> –N <sub>1</sub> | C <sub>1</sub> –Ir <sub>1</sub> –Cl <sub>1</sub> | C <sub>2</sub> –Ir <sub>1</sub> –Cl <sub>2</sub> |
|                         | 79.99(4)                                          | 93.0(2)                                         | 95.3(2)                                         | 94.4(2)                                         | 93.77(16)                                        | 93.28(17)                                        |
| <b>1<sub>calc</sub></b> | Ir <sub>1</sub> –C <sub>1</sub>                   | Ir <sub>1</sub> –C <sub>2</sub>                 | Ir <sub>1</sub> –N <sub>1</sub>                 | Ir <sub>1</sub> –N <sub>2</sub>                 | Ir <sub>1</sub> –Cl <sub>1</sub>                 | Ir <sub>1</sub> –Cl <sub>2</sub>                 |
|                         | 1.976                                             | 1.976                                           | 2.131                                           | 2.134                                           | 2.631                                            | 2.635                                            |
|                         | Cl <sub>1</sub> –Ir <sub>1</sub> –Cl <sub>2</sub> | C <sub>1</sub> –Ir <sub>1</sub> –C <sub>2</sub> | C <sub>1</sub> –Ir <sub>1</sub> –N <sub>2</sub> | C <sub>2</sub> –Ir <sub>1</sub> –N <sub>1</sub> | C <sub>1</sub> –Ir <sub>1</sub> –Cl <sub>1</sub> | C <sub>2</sub> –Ir <sub>1</sub> –Cl <sub>2</sub> |
|                         | 78.8                                              | 96.5                                            | 95.9                                            | 96.3                                            | 92.7                                             | 92.0                                             |
| <b>2</b>                | Ir <sub>1</sub> –C <sub>1</sub>                   | Ir <sub>1</sub> –C <sub>20</sub>                | Ir <sub>1</sub> –N <sub>1</sub>                 | Ir <sub>1</sub> –N <sub>2</sub>                 | Ir <sub>1</sub> –N <sub>3</sub>                  | Ir <sub>1</sub> –N <sub>4</sub>                  |
|                         | 1.986(2)                                          | 1.977(2)                                        | 2.0921(18)                                      | 2.0928(18)                                      | 2.1628(17)                                       | 2.1404(17)                                       |
|                         | N <sub>1</sub> –Ir <sub>1</sub> –C <sub>2</sub>   | C <sub>1</sub> –Ir <sub>1</sub> –C <sub>2</sub> | C <sub>1</sub> –Ir <sub>1</sub> –N <sub>2</sub> | C <sub>1</sub> –Ir <sub>1</sub> –N <sub>3</sub> | C <sub>2</sub> –Ir <sub>1</sub> –N <sub>4</sub>  | C <sub>2</sub> –Ir <sub>1</sub> –N <sub>3</sub>  |
|                         | 93.08(8)                                          | 87.37(8)                                        | 93.60(8)                                        | 100.25(7)                                       | 97.42(7)                                         | 169.86(8)                                        |



Table S3. Dihedral angles between the aryl and perimidine units ( $\varphi$ ) and angles between the N–CH<sub>3</sub> bond and the perimidine plane ( $\theta$ ) in the structures of **L1** and **L2**.

|                   | <b>L1</b> | <b>L2</b> |
|-------------------|-----------|-----------|
| $\varphi, ^\circ$ | 12.13(4)  | 67.42(13) |
| $\theta, ^\circ$  | -         | 5.08(7)   |

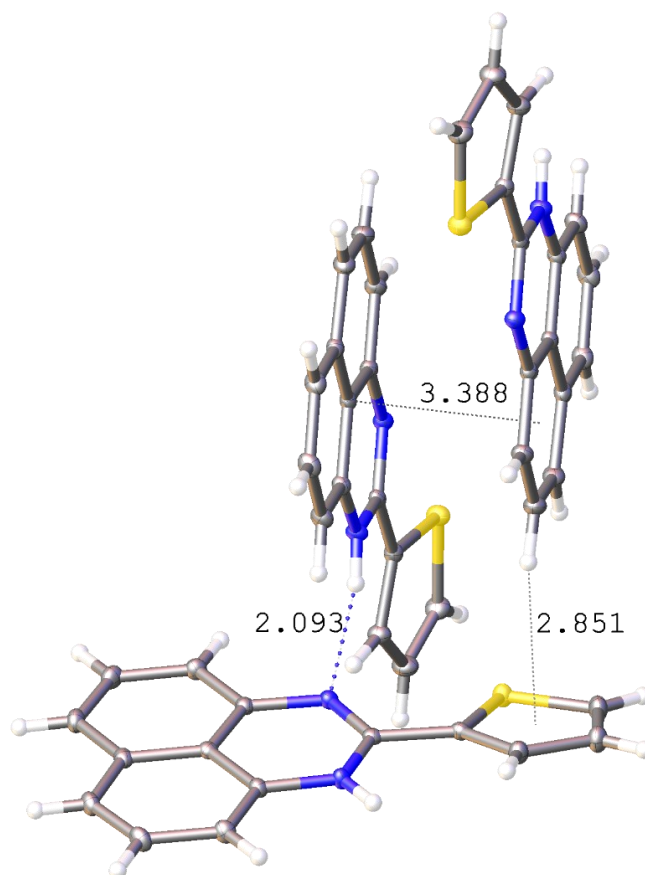

**Figure S13.** Hydrogen bonding,  $\pi\cdots\pi$  and C–H $\cdots\pi$  interactions in the crystal of **L1**.

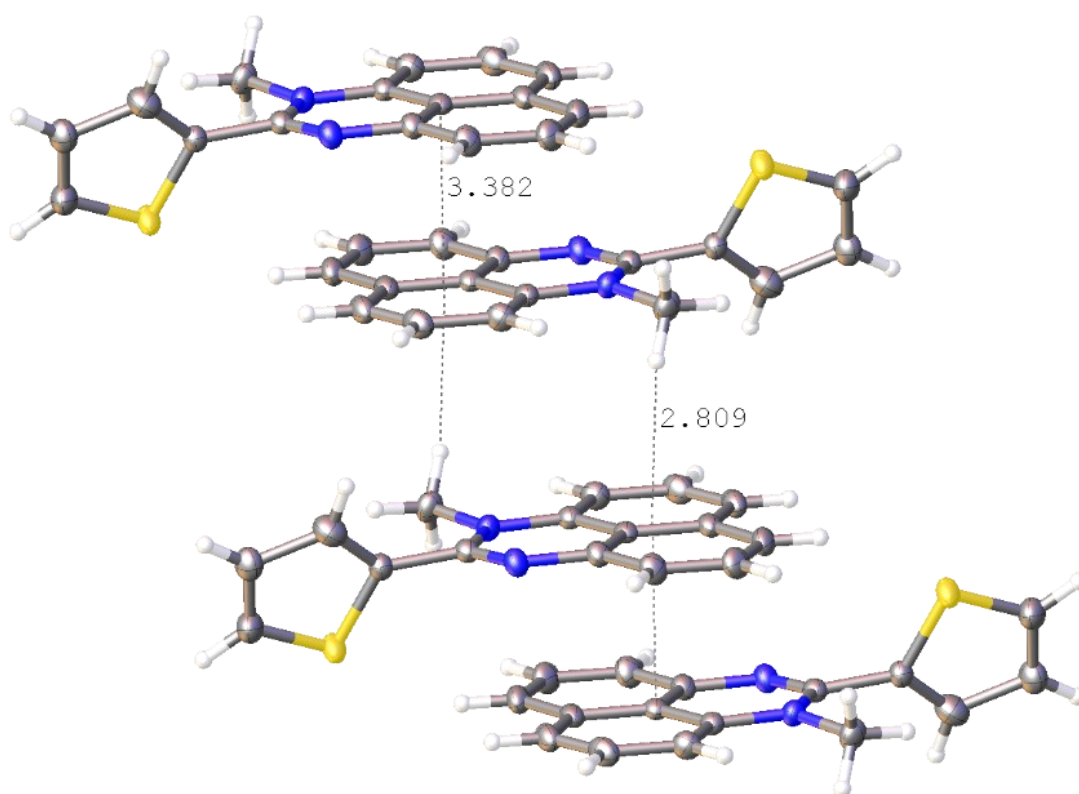

**Figure S14.**  $\pi \cdots \pi$  and C-H $\cdots\pi$  interactions in the crystal of L2.

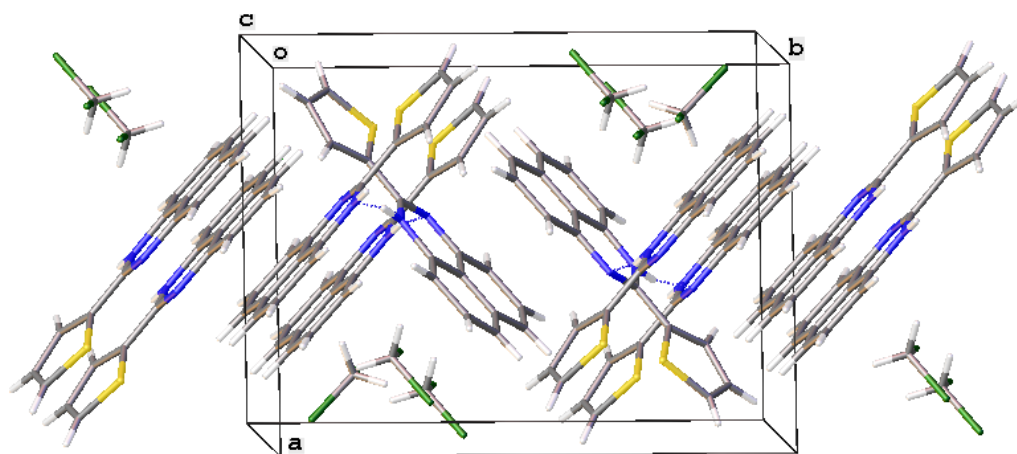

**Figure S15.** The fragment of the crystal packing of L1.

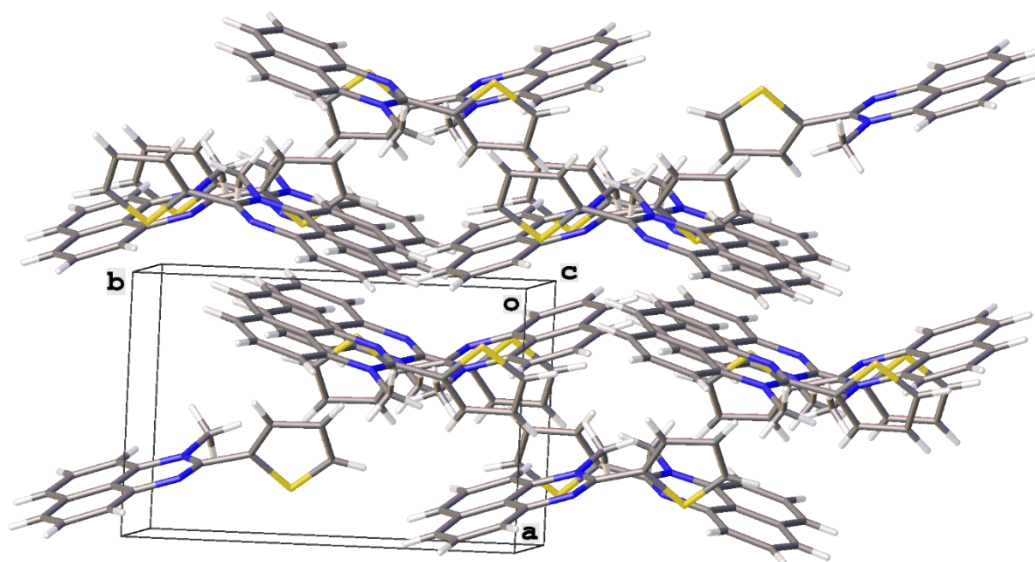

**Figure S16.** The fragment of the crystal packing of **L2**.

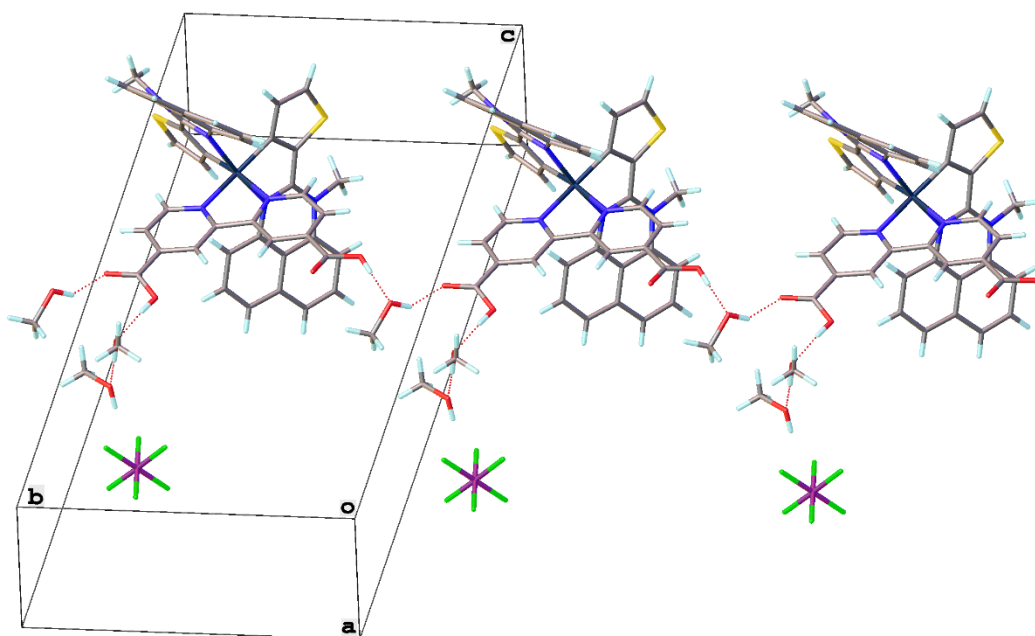

**Figure S17.** The fragment of the crystal packing of **2**.

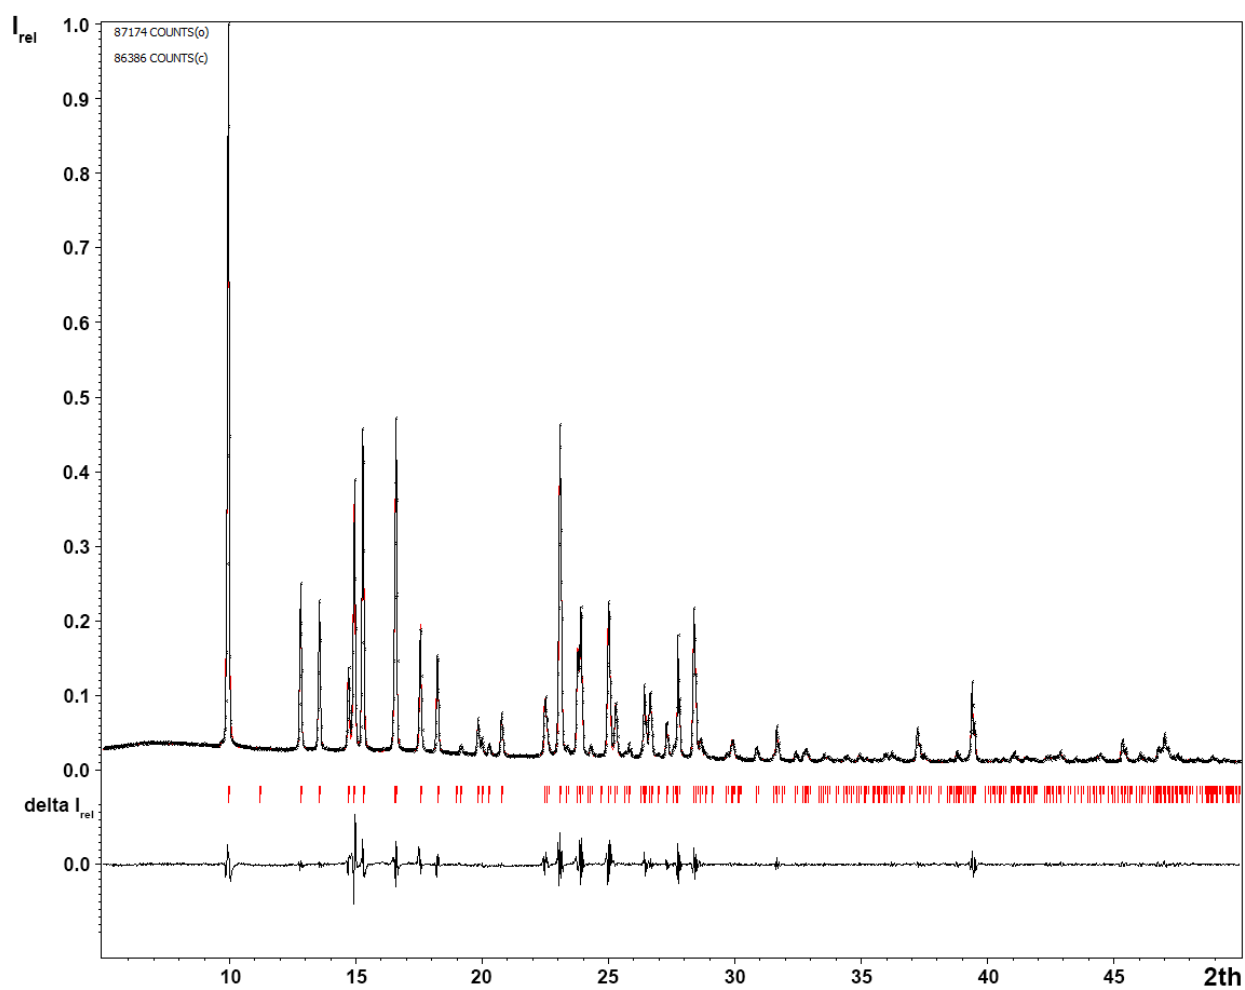

**Figure S18.** Experimental (black) and simulated (red) X-ray powder diffraction patterns of **L2**.

Table S4. Unit cell parameters for **L2** based on single-crystal and powder X-ray data and details of their refinement.

|                | $a$ , Å   | $b$ , Å    | $c$ , Å    | $\beta$ , ° | $V$ , Å <sup>3</sup> | FOM    | 2 $\theta$ -window | peaks |
|----------------|-----------|------------|------------|-------------|----------------------|--------|--------------------|-------|
| powder         | 7.894(1)  | 11.566(2)  | 13.794(3)  | 93.43(1)    | 1257.3(3)            | 100.00 | 0.06               | 77/78 |
| single-crystal | 7.7813(4) | 11.5947(5) | 13.6577(6) | 93.067(2)   | 1230.46(10)          |        |                    |       |

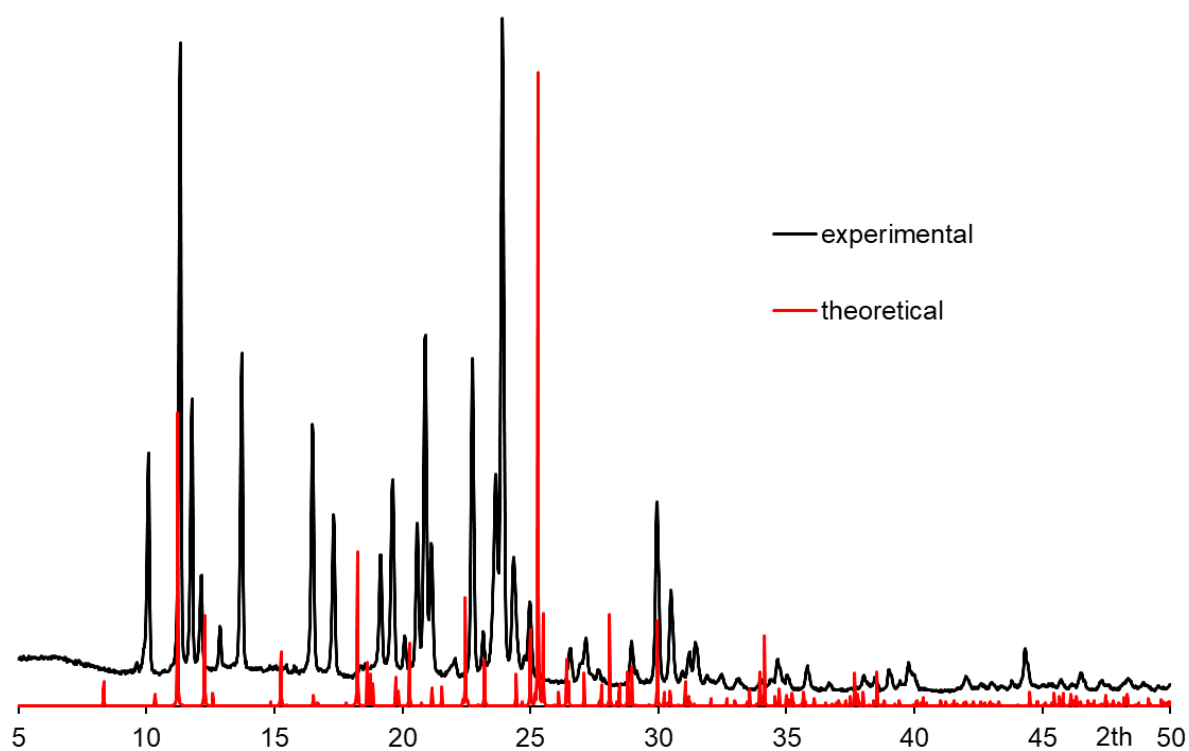

**Figure S19.** Experimental (black) and simulated (red) X-ray powder diffraction patterns of **L1**.

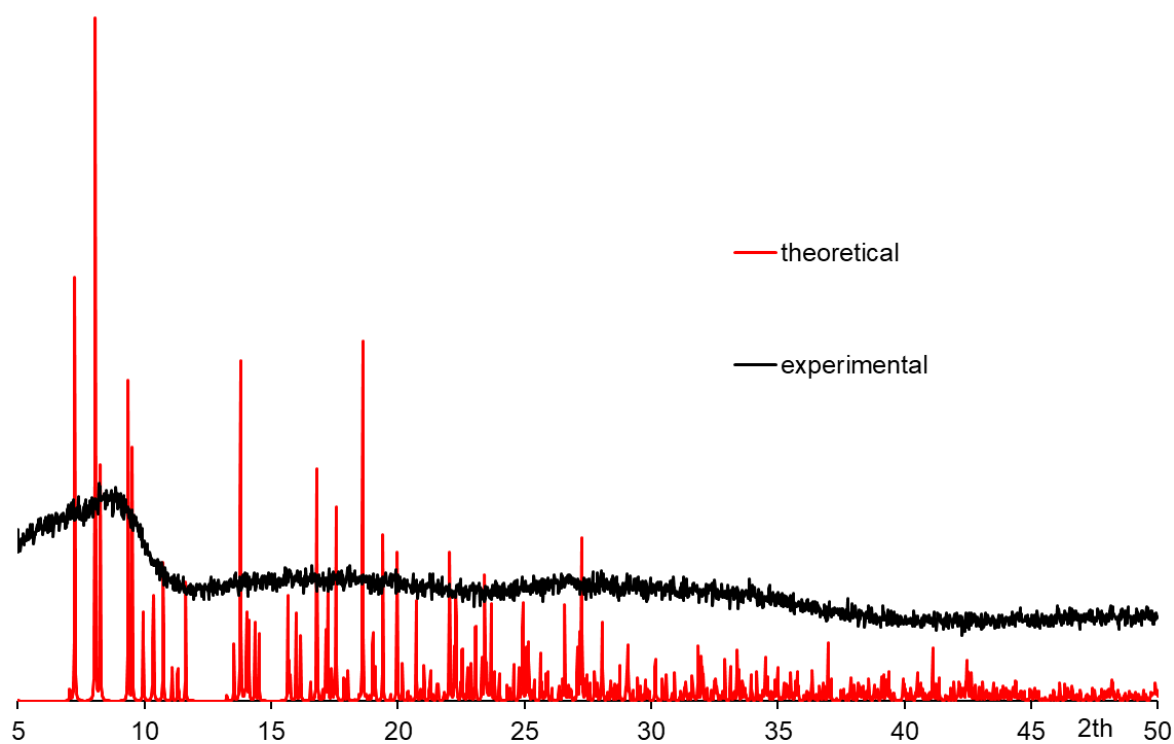

**Figure S20.** Experimental (black) and simulated (red) X-ray powder diffraction patterns of **2**.

### 3. Electrochemical and photovoltaic data

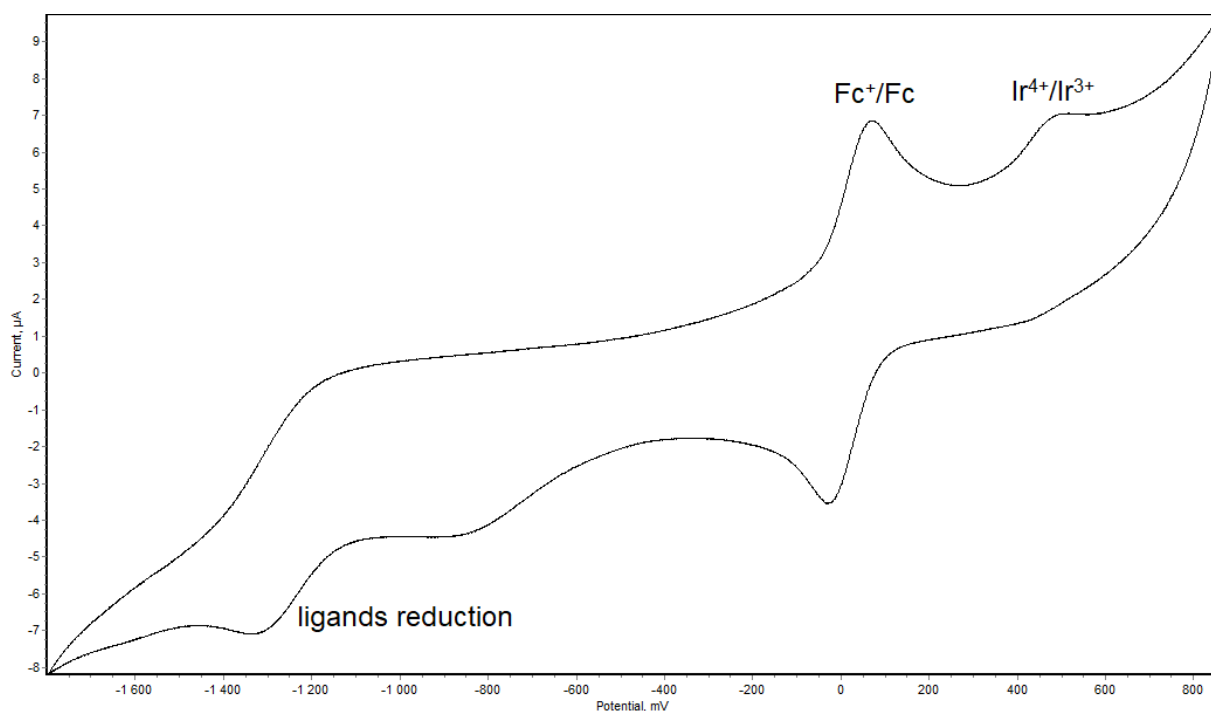

**Figure S21.** Cyclic voltammogram of **2** recorded in Ar-saturated acetonitrile at 20°C versus ferrocene at a scan rate of 100 mV/s (electrolyte 0.1 M NBu<sub>4</sub>ClO<sub>4</sub>).

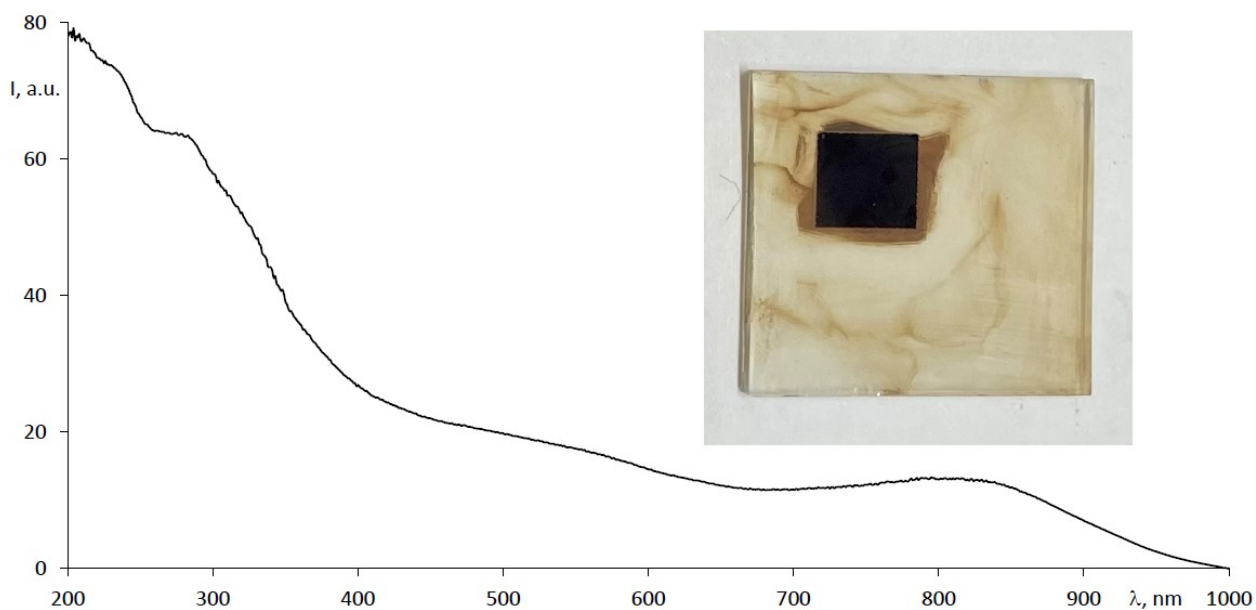

**Figure S22.** Diffuse reflectance spectrum of a TiO<sub>2</sub> photoanode sensitized by complex **2** measured at the TiO<sub>2</sub> side of the electrode.

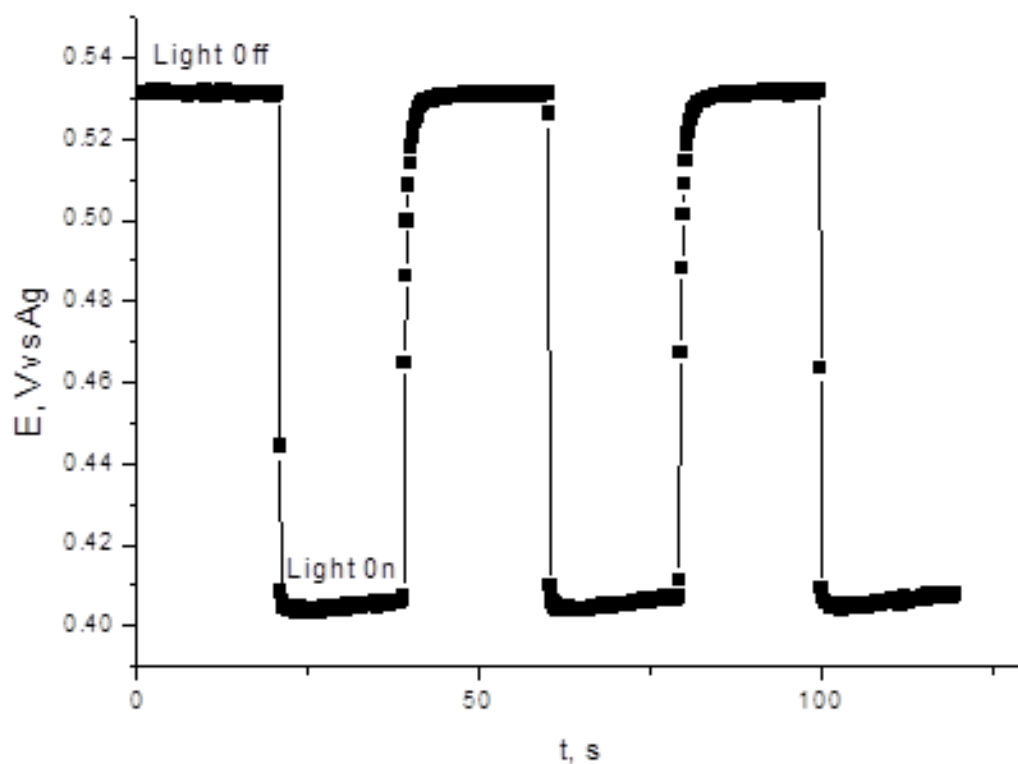

**Figure S23.** Time dependence of potential of  $\text{TiO}_2$  photoanode sensitized by complex **2** in the dark and on exposure to AM 1.5 G simulated solar light ( $100 \text{ mW cm}^{-2}$ ) in acetonitrile solution in the presence of 0.5 M LiI + 0.05 M  $\text{I}_2$ .

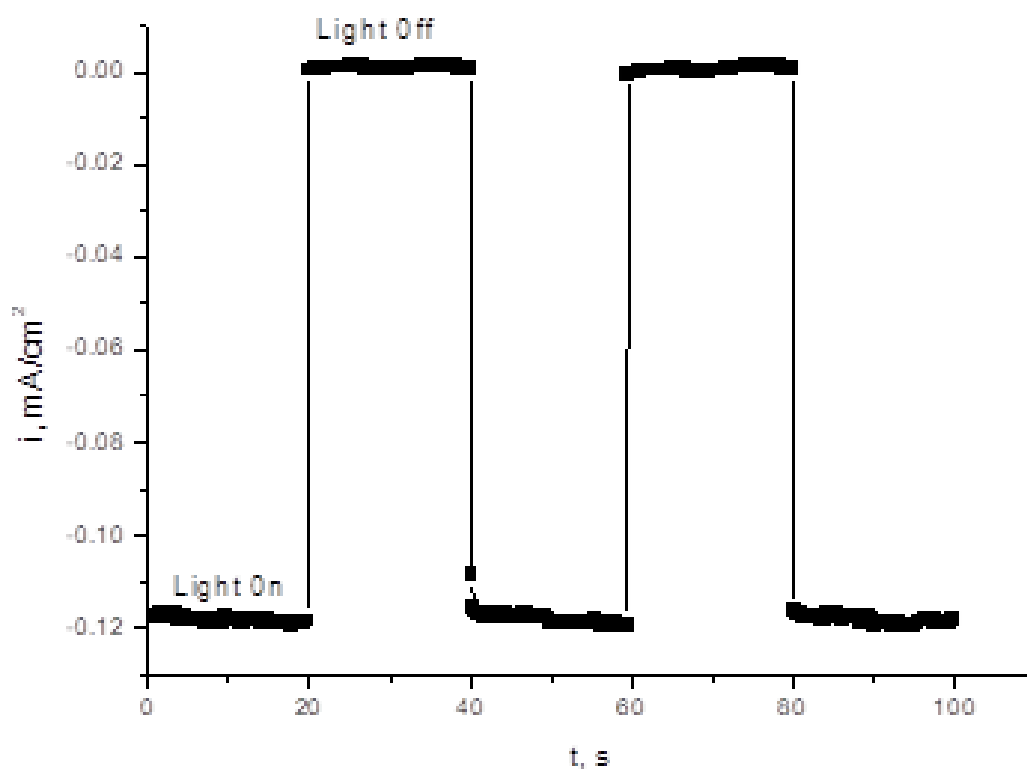

**Figure S24.** Time dependence of current at short circuit for PECC with  $\text{TiO}_2$  photoanode sensitized by complex **2** in the dark and on exposure to AM 1.5 G simulated solar light ( $100 \text{ mW cm}^{-2}$ ) in acetonitrile solution in the presence of 0.5 M LiI + 0.05 M  $\text{I}_2$ .

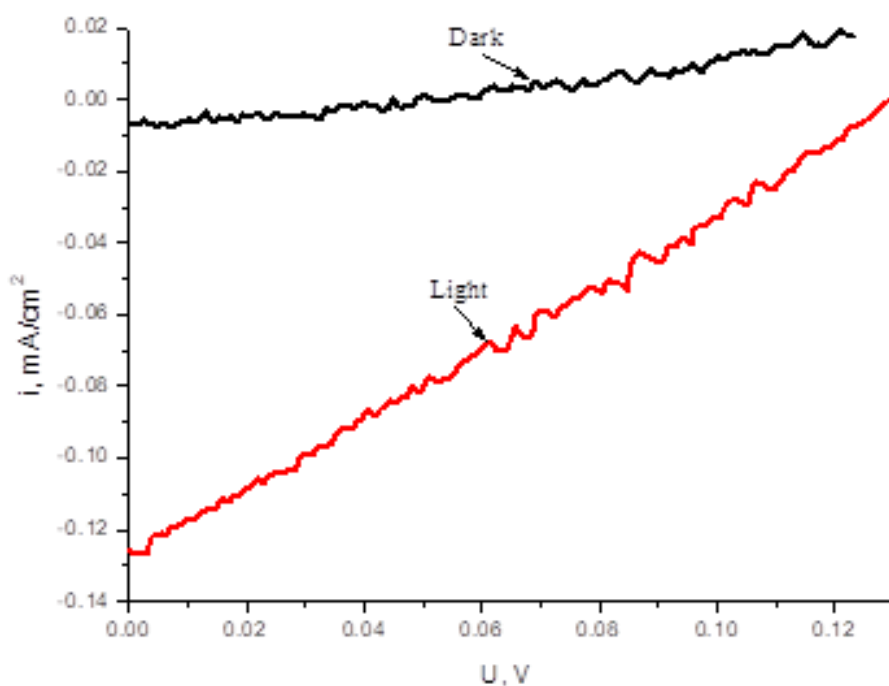

**Figure S25.** Current–voltage characteristic of a TiO<sub>2</sub> photoanode sensitized by complex **2** under AM 1.5 G simulated solar light (100 mW cm<sup>-2</sup>) (*red*) and in the dark (*black*) in acetonitrile solution of 0.5 M LiI + 0.05 M I<sub>2</sub>.

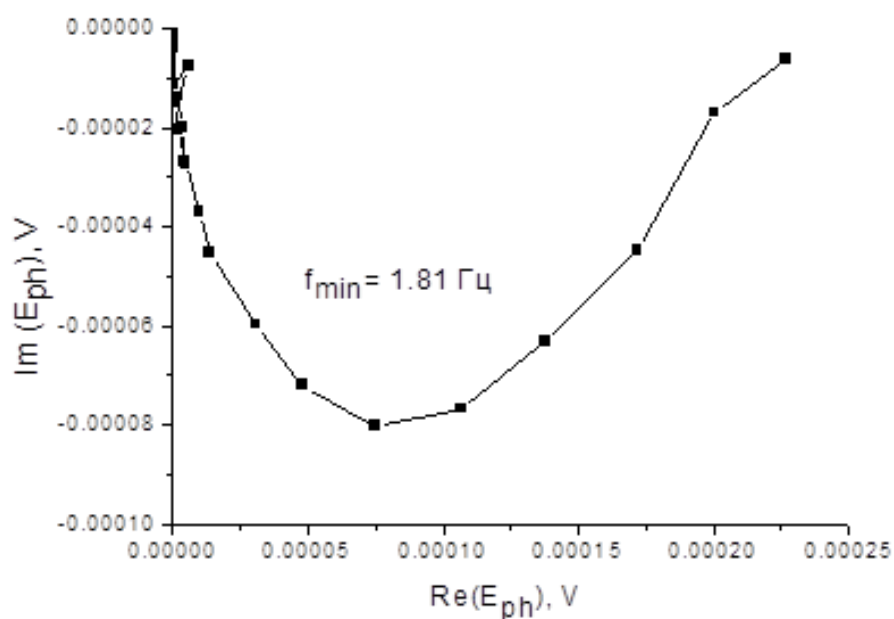

**Figure S26.** Intensity-modulated photovoltage spectrum (IMVS) for TiO<sub>2</sub> photoanode sensitized by complex **2**. Illumination by monochromatic light (428 nm) at the power of 12 mW.



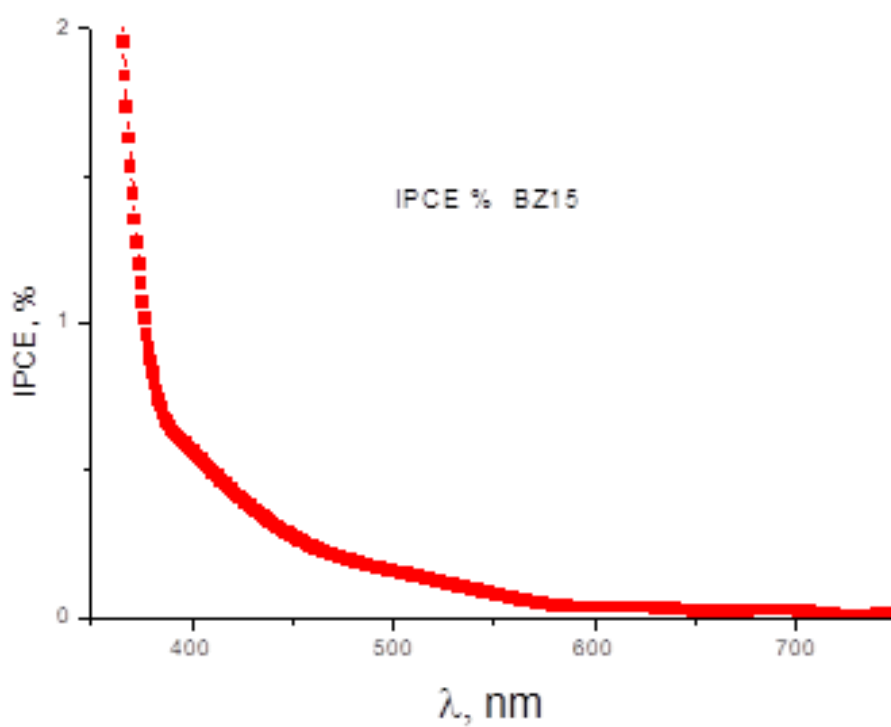

**Figure S27.** Incident photon-to-electron conversion efficiency (IPCE) spectrum of TiO<sub>2</sub> photoanode sensitized by complex **2** under AM 1.5 G simulated solar light (100 mW cm<sup>-2</sup>).

#### 4. Computational results

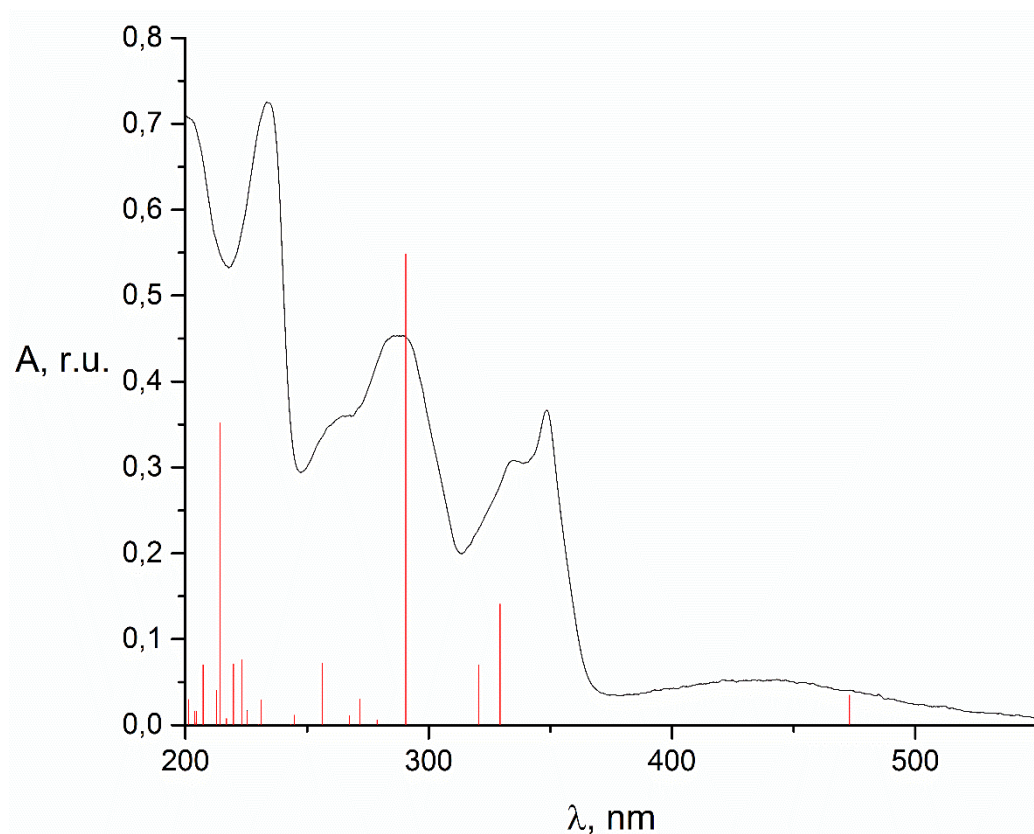

**Figure S28.** TDDFT electronic (*red*) and experimental (*black*) spectra of **L1**.

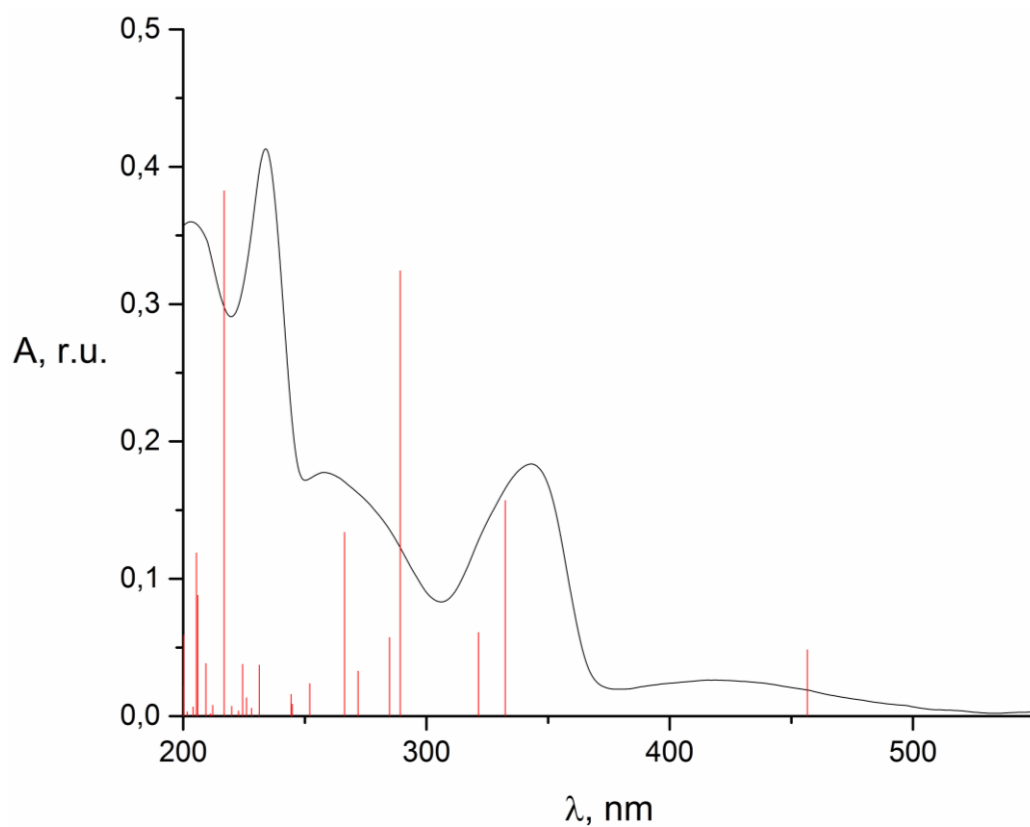

**Figure S29.** TDDFT electronic (*red*) and experimental (*black*) spectra of **L2**.

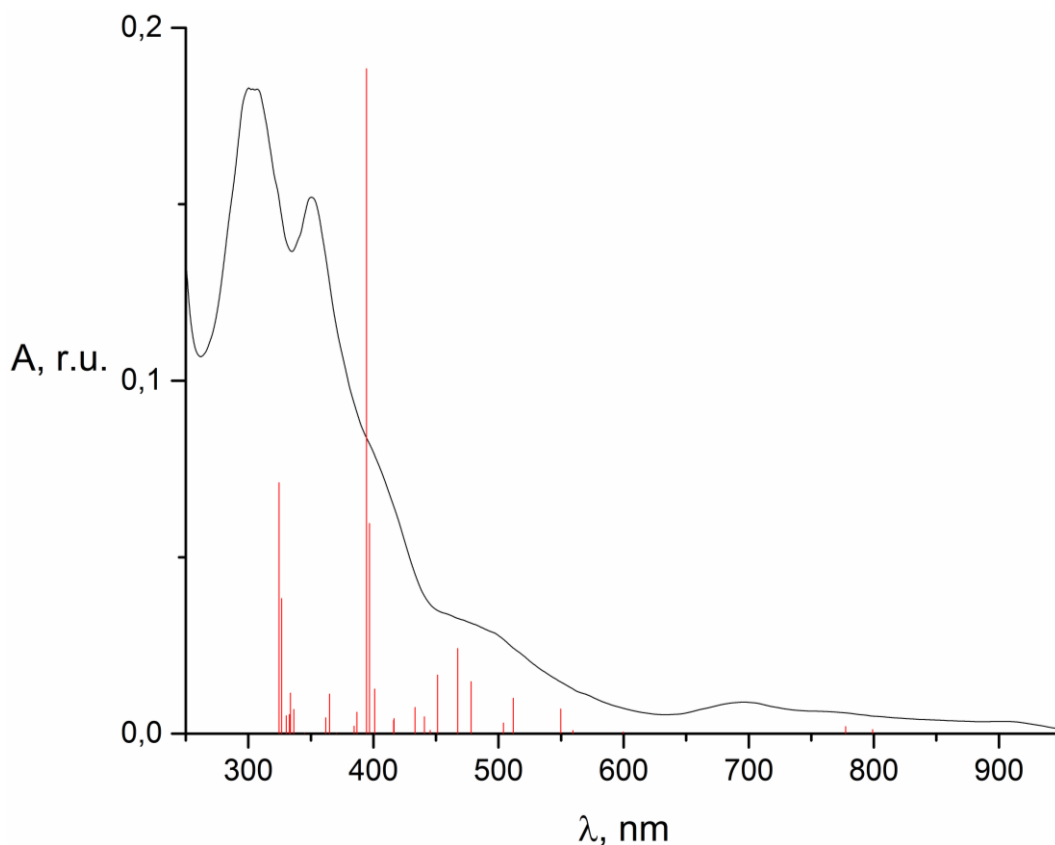

**Figure S30.** TDDFT electronic (*red*) and experimental (*black*) spectra of **2**.

Table S5. TDDFT singlet excited states ( $\lambda > 500$  nm) for **2**.

| Complex  | State | $\lambda$ / nm (f) | Dominant monoexcitations                                                                                              |
|----------|-------|--------------------|-----------------------------------------------------------------------------------------------------------------------|
| <b>1</b> | S1    | 799 (0.0011)       | H $\rightarrow$ L (88%) $\{\pi(C^{\wedge}N) \rightarrow \pi^*(N^{\wedge}N)\}$                                         |
|          | S2    | 777 (0.0020)       | H-1 $\rightarrow$ L (88%) $\{\pi(C^{\wedge}N) \rightarrow \pi^*(N^{\wedge}N)\}$                                       |
|          | S3    | 600 (0.0004)       | H-2 $\rightarrow$ L (98%) $\{\pi(C^{\wedge}N) \rightarrow \pi^*(N^{\wedge}N), d(Ir) \rightarrow \pi^*(N^{\wedge}N)\}$ |
|          | S4    | 560 (0.0008)       | H $\rightarrow$ L+1 (91%) $\{\pi(C^{\wedge}N) \rightarrow \pi^*(N^{\wedge}N)\}$                                       |
|          | S5    | 550 (0.0070)       | H-1 $\rightarrow$ L+1 (91%) $\{\pi(C^{\wedge}N) \rightarrow \pi^*(N^{\wedge}N)\}$                                     |
|          | S6    | 511 (0.0100)       | H $\rightarrow$ L+2 (92%) $\{\pi(C^{\wedge}N) \rightarrow \pi^*(N^{\wedge}N)\}$                                       |
|          | S7    | 504 (0.0030)       | H-1 $\rightarrow$ L+2 (91%) $\{\pi(C^{\wedge}N) \rightarrow \pi^*(N^{\wedge}N)\}$                                     |
