# Supplementary material for: A Panchromatic Cyclometalated Iridium Dye Based on 2-Thienyl-Perimidine
Source: Molecules. 2022 May 17;27(10):3201. doi: 10.3390/molecules27103201 (PMC9143831; doi:10.3390/molecules27103201)
Supplement: Supplementary file 1 [file molecules-27-03201-s001.zip]

Archive with 5 entries (5 files):
- checkcif 1.pdf
- checkcif 2.pdf
- checkcif L1.pdf
- checkcif L2.pdf
- molecules-1727601- Supplementary data-revised.pdf
